# Supplementary material for: The transcription factor ChREBP Orchestrates liver carcinogenesis by coordinating the PI3K/AKT signaling and cancer metabolism
Source: PubMed Central journal article supplement (PMC10904844; doi:10.1038/s41467-024-45548-w), 2024-02-29
Supplement: 41467_2024_45548_MOESM1_ESM.pdf [file 41467_2024_45548_MOESM1_ESM.pdf]

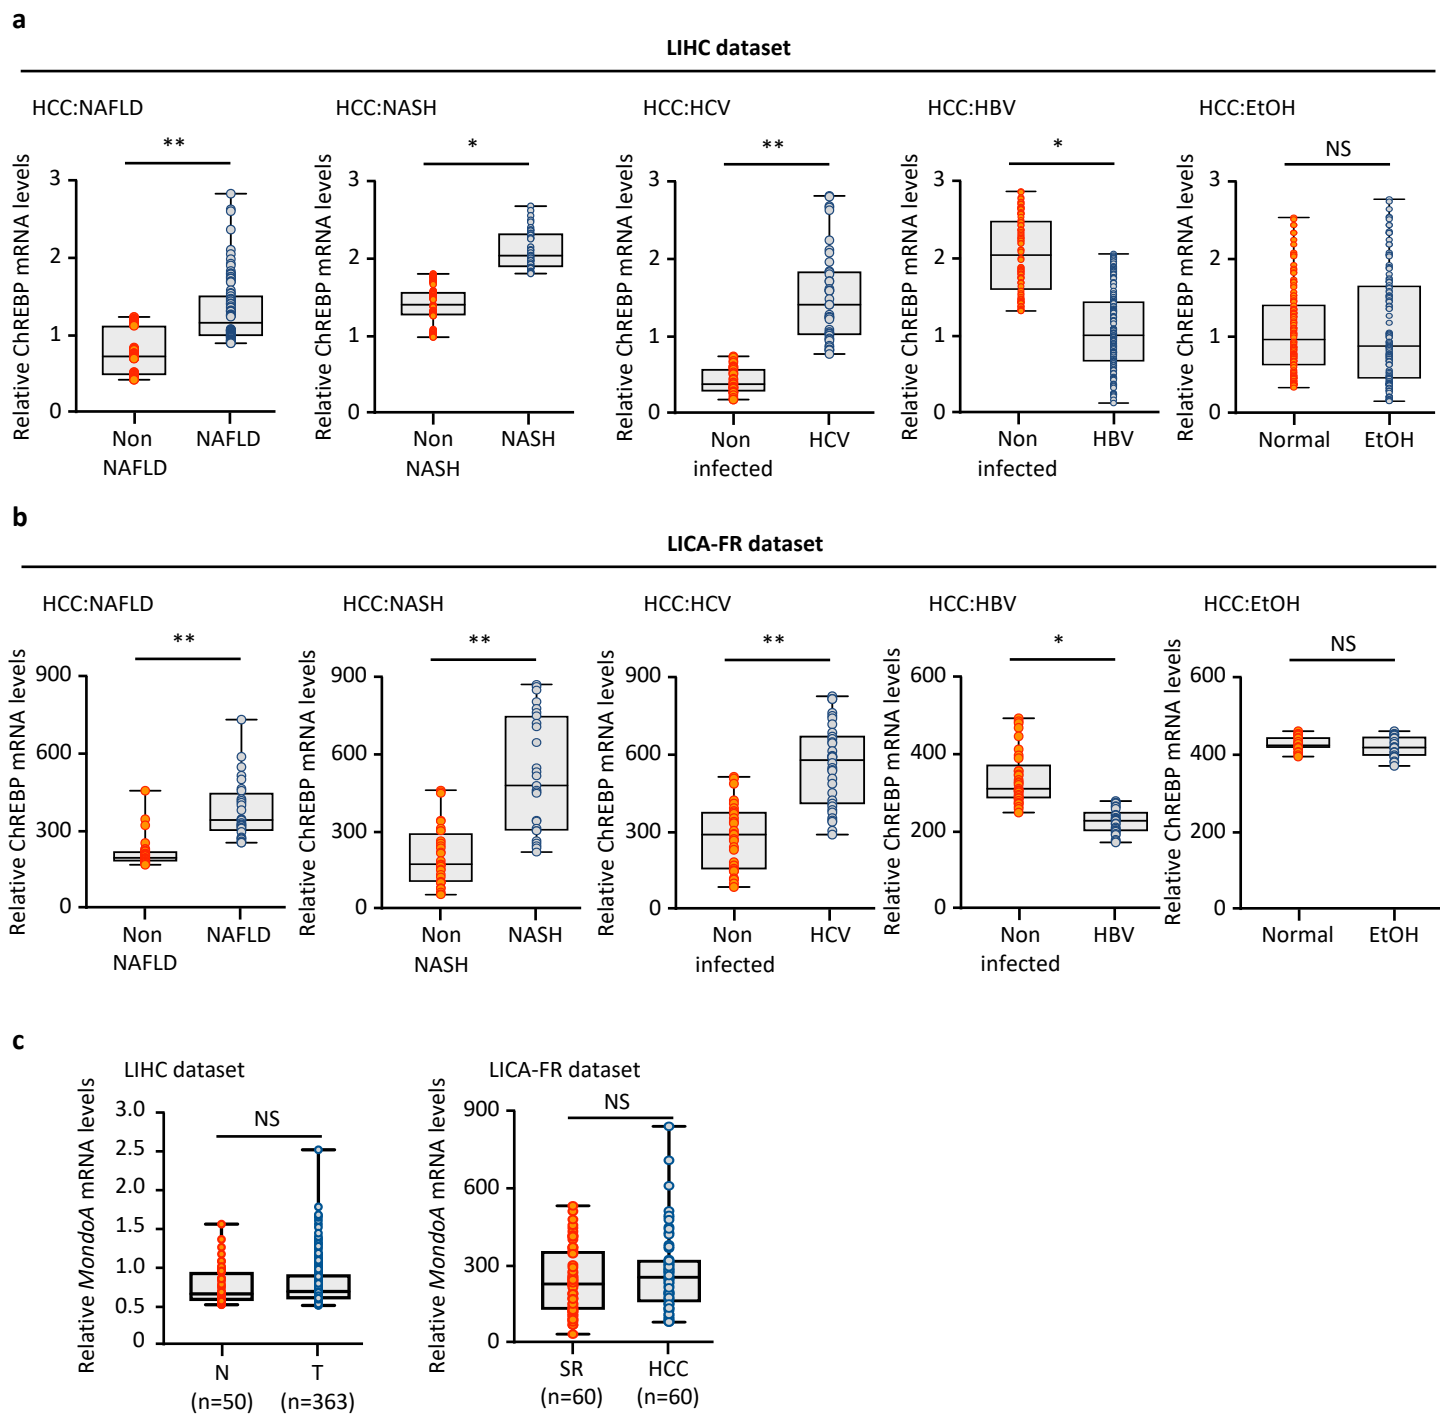

**Figure. S1**

**Supplementary Figure 1.** ChREBP expression is increased in *human* HCC and signs tumors with poor prognosis. **(a and b)** Expression levels of ChREBP respectively in the LIHC **(a)** and LICA-FR **(b)** datasets depicting a positive correlation between its expression levels with chronic liver diseases including NAFLD, NASH and HCV infection. **(c)** Data mining of MondoA gene expression level between HCC (T) and normal liver tissues (N) from the LIHC and LICA-FR Oncomine datasets. For all box plots, the boundary of the box closest to zero indicates the 25 th percentile, a black line within the box marks the median, and the boundary of the box farthest from zero indicates the 75 th percentile. Whiskers above and below the box indicate the 10 th and 90 th percentiles. Points above and below the whiskers indicate outliers outside the 10 th and 90 th percentiles (statistical analysis can be found in the Source Data file). (a, b and c) Statistical analyses were made using unpaired two-sided Student's t-test. \*P < 0.05. \*\*P < 0.01. NS = non-significant.

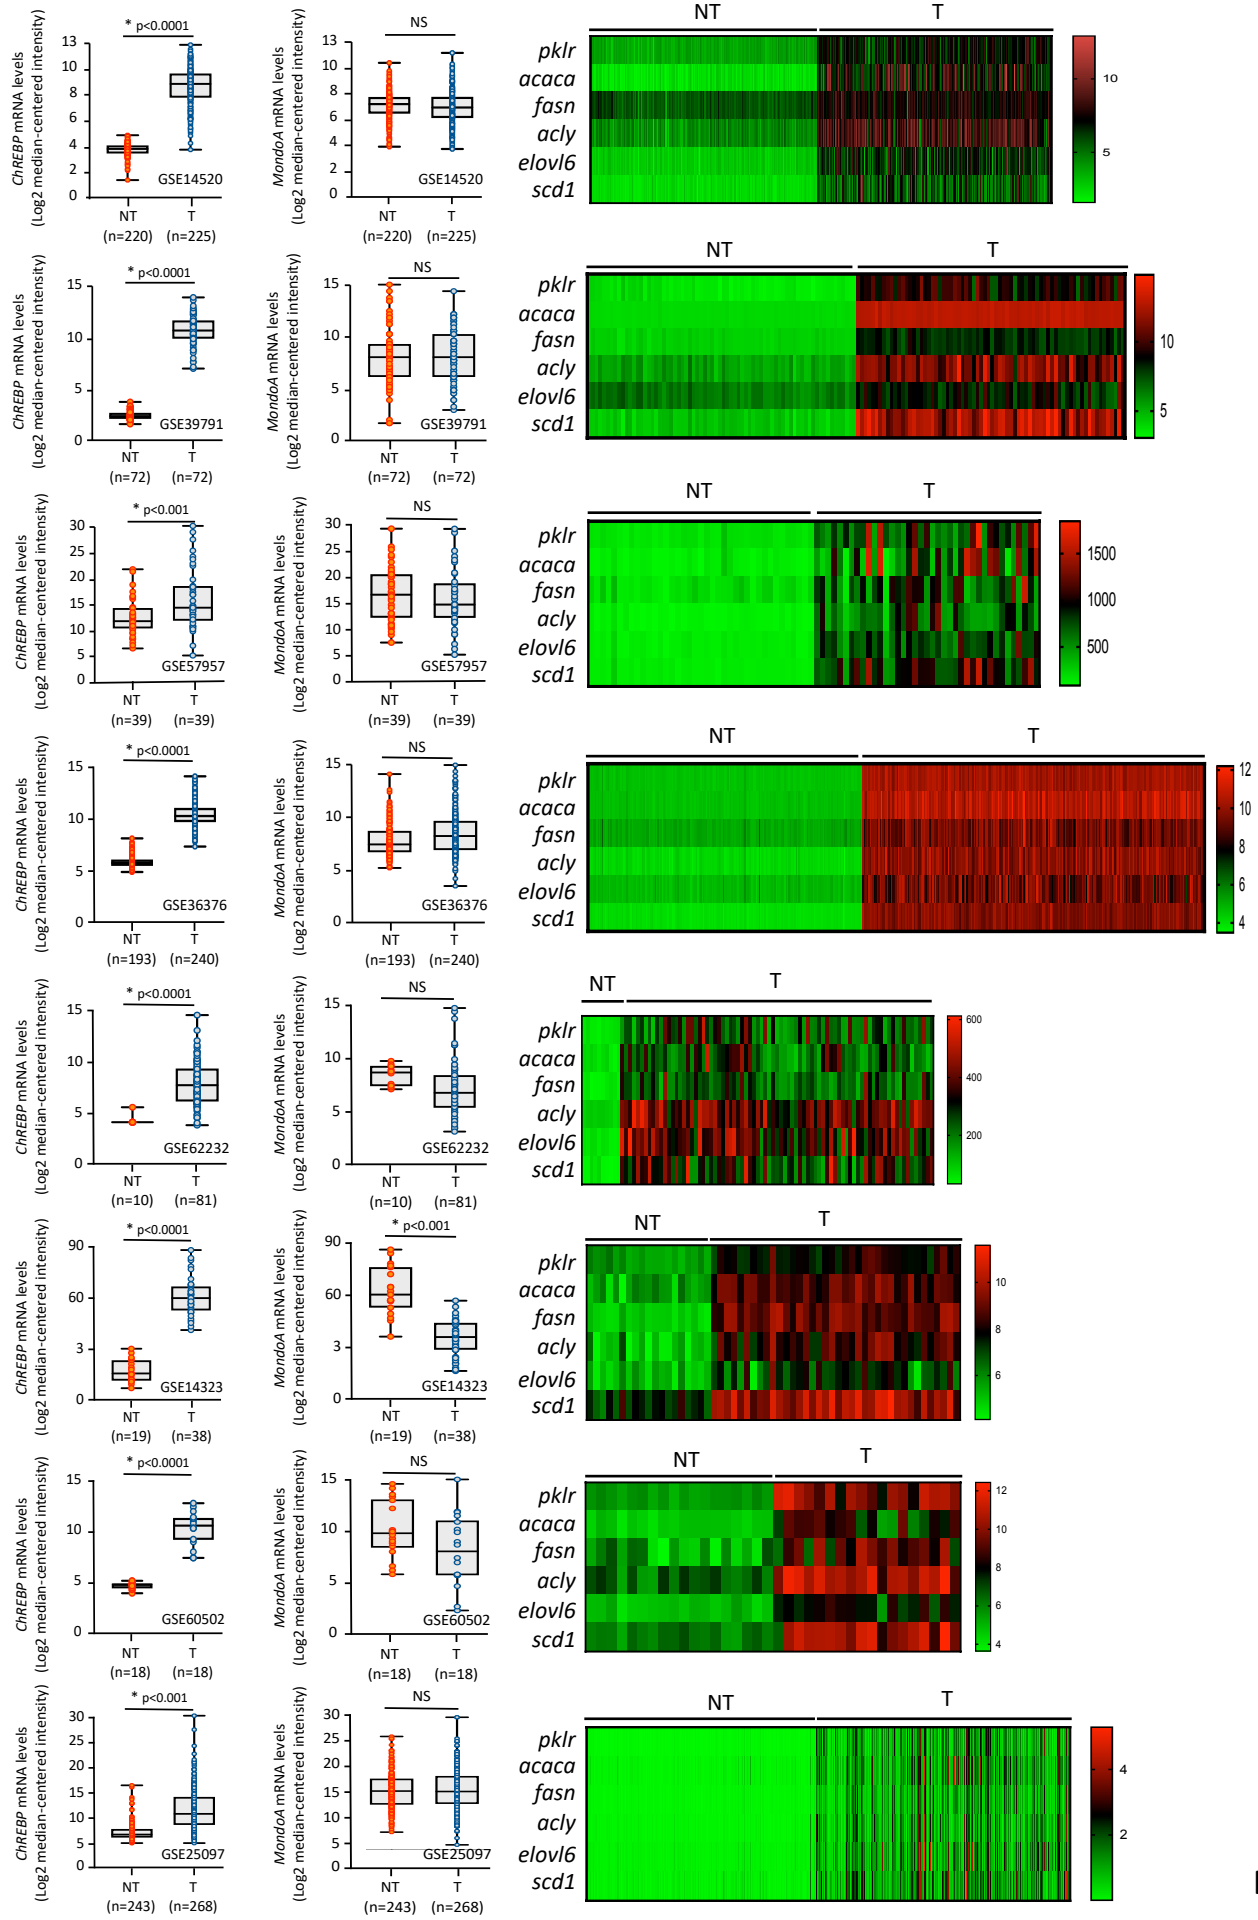

Figure. S2

**Supplementary Figure 2.** ChREBP expression is systematically increased in publicly available HCC *human* datasets. Expression levels of ChREBP, MondoA and ChREBP-regulated genes between normal/adjacent liver tissues and HCC tumors from 8 publicly available datasets (Table S1). For all box plots, the boundary of the box closest to zero indicates the 25 th percentile, a black line within the box marks the median, and the boundary of the box farthest from zero indicates the 75 th percentile. Whiskers above and below the box indicate the 10 th and 90 th percentiles. Points above and below the whiskers indicate outliers outside the 10 th and 90 th percentiles (statistical analysis can be found in the Source Data file). Statistical analyses were made using unpaired two-sided Student's t-test. \*P < 0.01.



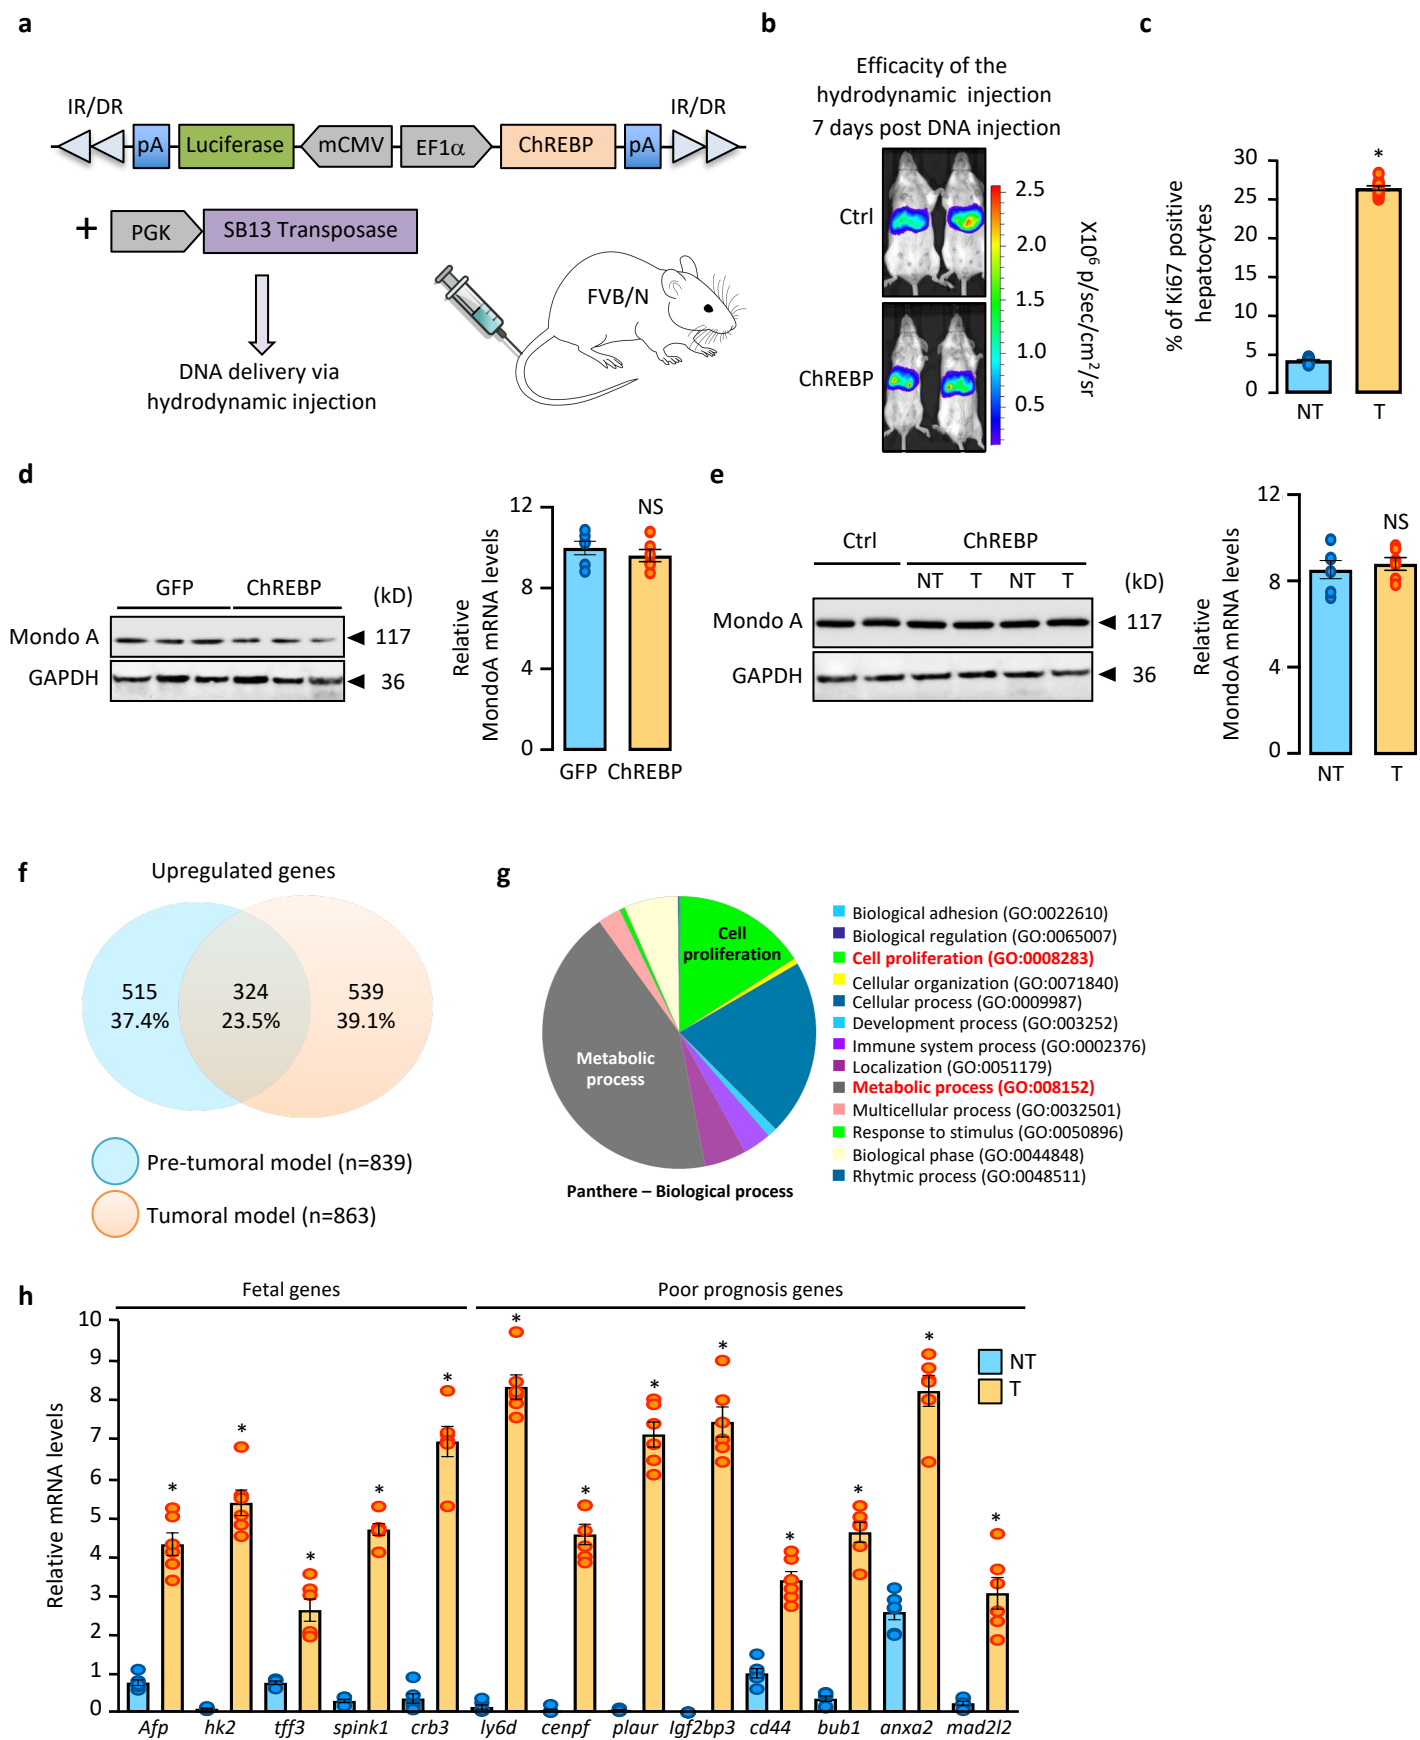

Figure. S3

**Supplementary Figure 3.** Stable ChREBP overexpression promotes HCC initiation and development in *mice*. **(a)** Schematic representation of the vectors used for the hydrodynamic injections: PGK/SB13 transposase, pT3/Caggs-luciferase (empty vector / Ctrl) and pT3/Caggs-ChREBP-luciferase (in-one). **(b)** Efficacy of the hydrodynamic injection measured by bioluminescence imaging 7 days post treatment (n = 10 biologically independent *mice* per group). **(c)** Quantification of Ki67 immunostaining shown in Figure 2g (n = 10 biologically independent *mice* per group). **(d)** Expression profile of MondoA protein content and relative MondoA gene expression corrected to TBP in ChREBP overexpressing *mice* (n = 6 biologically independent *mice* per group). **(e)** Expression profile of MondoA protein content and relative MondoA gene expression corrected to TBP in ChREBP tumors (n = 6 biologically independent *mice* per group). **(f)** Venn diagram of overlap between genes that are differentially upregulated in the liver of *mice* overexpressing ChREBP for 3 weeks (pre-malignant) and in ChREBP tumors (n = 12 biologically independent *mice* per group). **(g)** Genes that were commonly upregulated in the liver of *mice* overexpressing ChREBP for 3 weeks and in ChREBP tumors were subjected to gene ontology enrichment analysis. Pie charts represent stepwise hierarchical tree drill down of significantly enriched terms under the heading biological process. **(h)** Relative expression of genes expressed in poor prognosis HCC measured in ChREBP tumors. The expression of specific gene was normalized to TBP (TATA binding protein) mRNA levels (n = 6 biologically independent *mice* per group). All error bars represent mean  $\pm$  SEM. (c, d, e, h) Statistical analyses were made using unpaired two-sided Student's t-test \*P < 0.001 NT vs T, NS = Non-Significant.

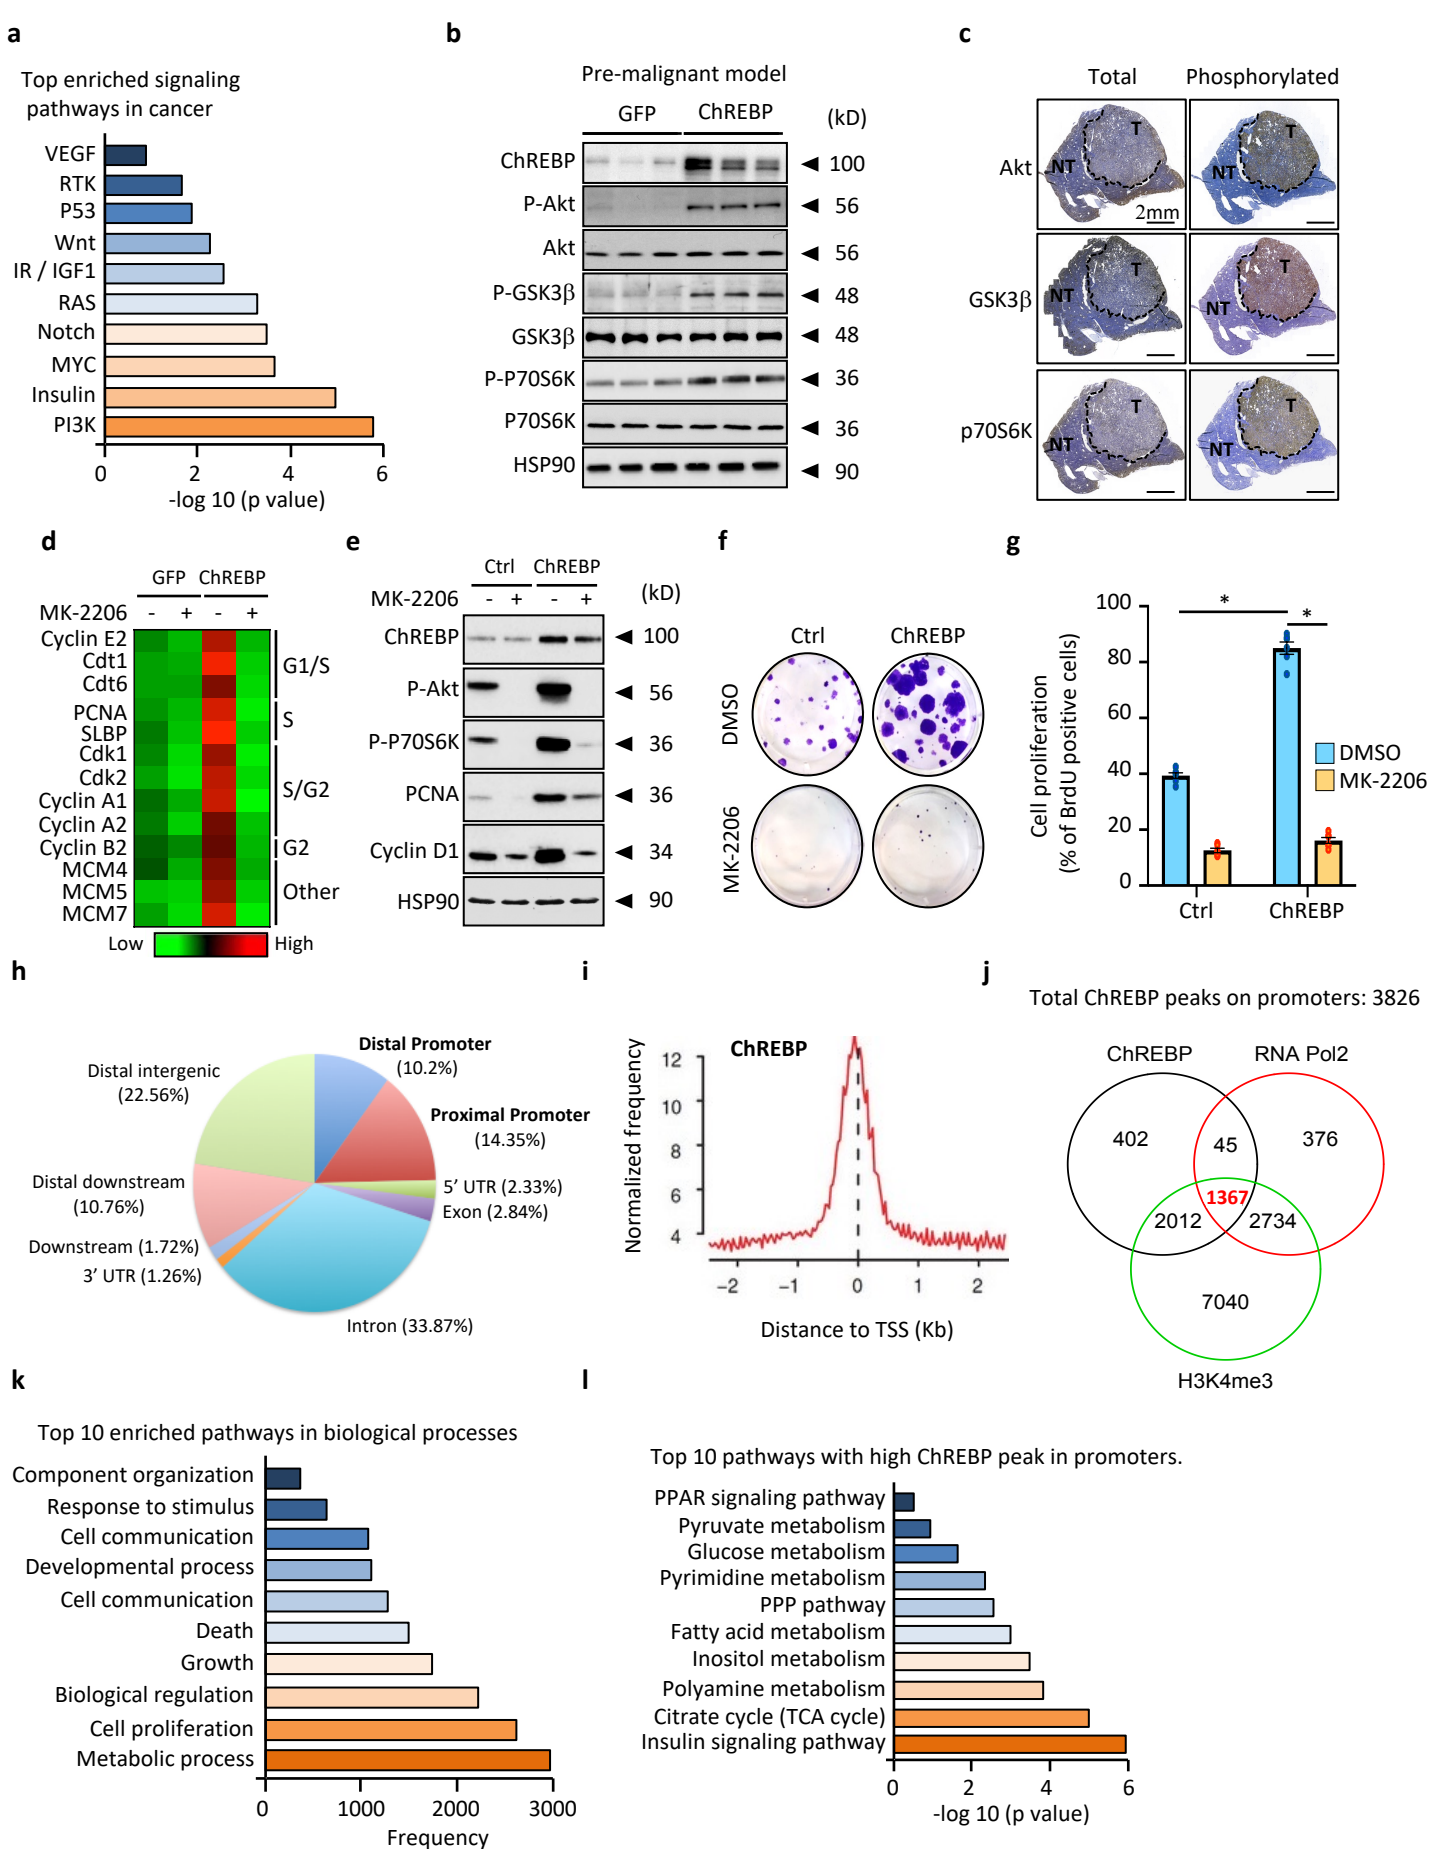

Figure. S4

**Supplementary Figure 4.** PI3K/AKT signaling mediates ChREBP pro-proliferative effect. **(a)** Top ten enriched signaling pathways in ChREBP tumors (n = 12 biologically independent *mice* per group). The list of differentially expressed genes under the term PI3K signaling can be found in supplementary table 6. **(b)** Representative Western blot analysis of the activity of the PI3K/AKT signaling in the pre-malignant model (n = 10 biologically independent *mice* per group). **(c)** Representative immuno-staining evaluating levels of AKT, GSK3 $\beta$  and p70S6K phosphorylation in ChREBP tumors (T) compared to non-tumoral tissue (NT) (n = 20 biologically independent *mice* per group). Scale bar = 2 mm. **(d)** Mice, injected with either GFP or ChREBP overexpressing adenovirus, were treated with or without MK-2206 (120 mg/kg) for 3 weeks. Heatmap presenting the expression of cell cycle genes (n = 12 biologically independent *mice* per group). **(e-g)** Huh7 cells, stably overexpressing ChREBP, were treated with DMSO or MK-2206 (100 nM) for 24h. **(e)** Representative Western blot analysis of the activity of the PI3K/AKT signaling and cell cycle (n = 3 independent experiments). **(f)** Representative clonogenic assay shown (n = 3 independent experiments). **(g)** Cell proliferation index determined by measuring the % of BrdU positive cells (n = 3 independent experiments). **(h)** Genomic distribution of ChREBP peaks after ChIP-sequencing experiments from primary cultured hepatocytes incubated with 100 nM insulin and 25 mM glucose for 24 h. **(i)** Tag density plots displaying ChREBP tags distribution relative to the transcriptional start site (TSS). **(j)** Venn diagrams showing overlap between ChREBP-bound, RNA polIII-bound and H3K4me3-marked promoters. **(k)** Top ten enriched biological processes from gene ontology analysis performed on identified ChREBP-target genes. **(l)** Top enriched pathways for the top 1000 genes with high ChREBP peak intensity within promoters. All error bars represent mean  $\pm$  SEM. (g) Statistical analyses were made using two-way ANOVA and Tukey's multiple-comparisons test. \* P < 0.01.

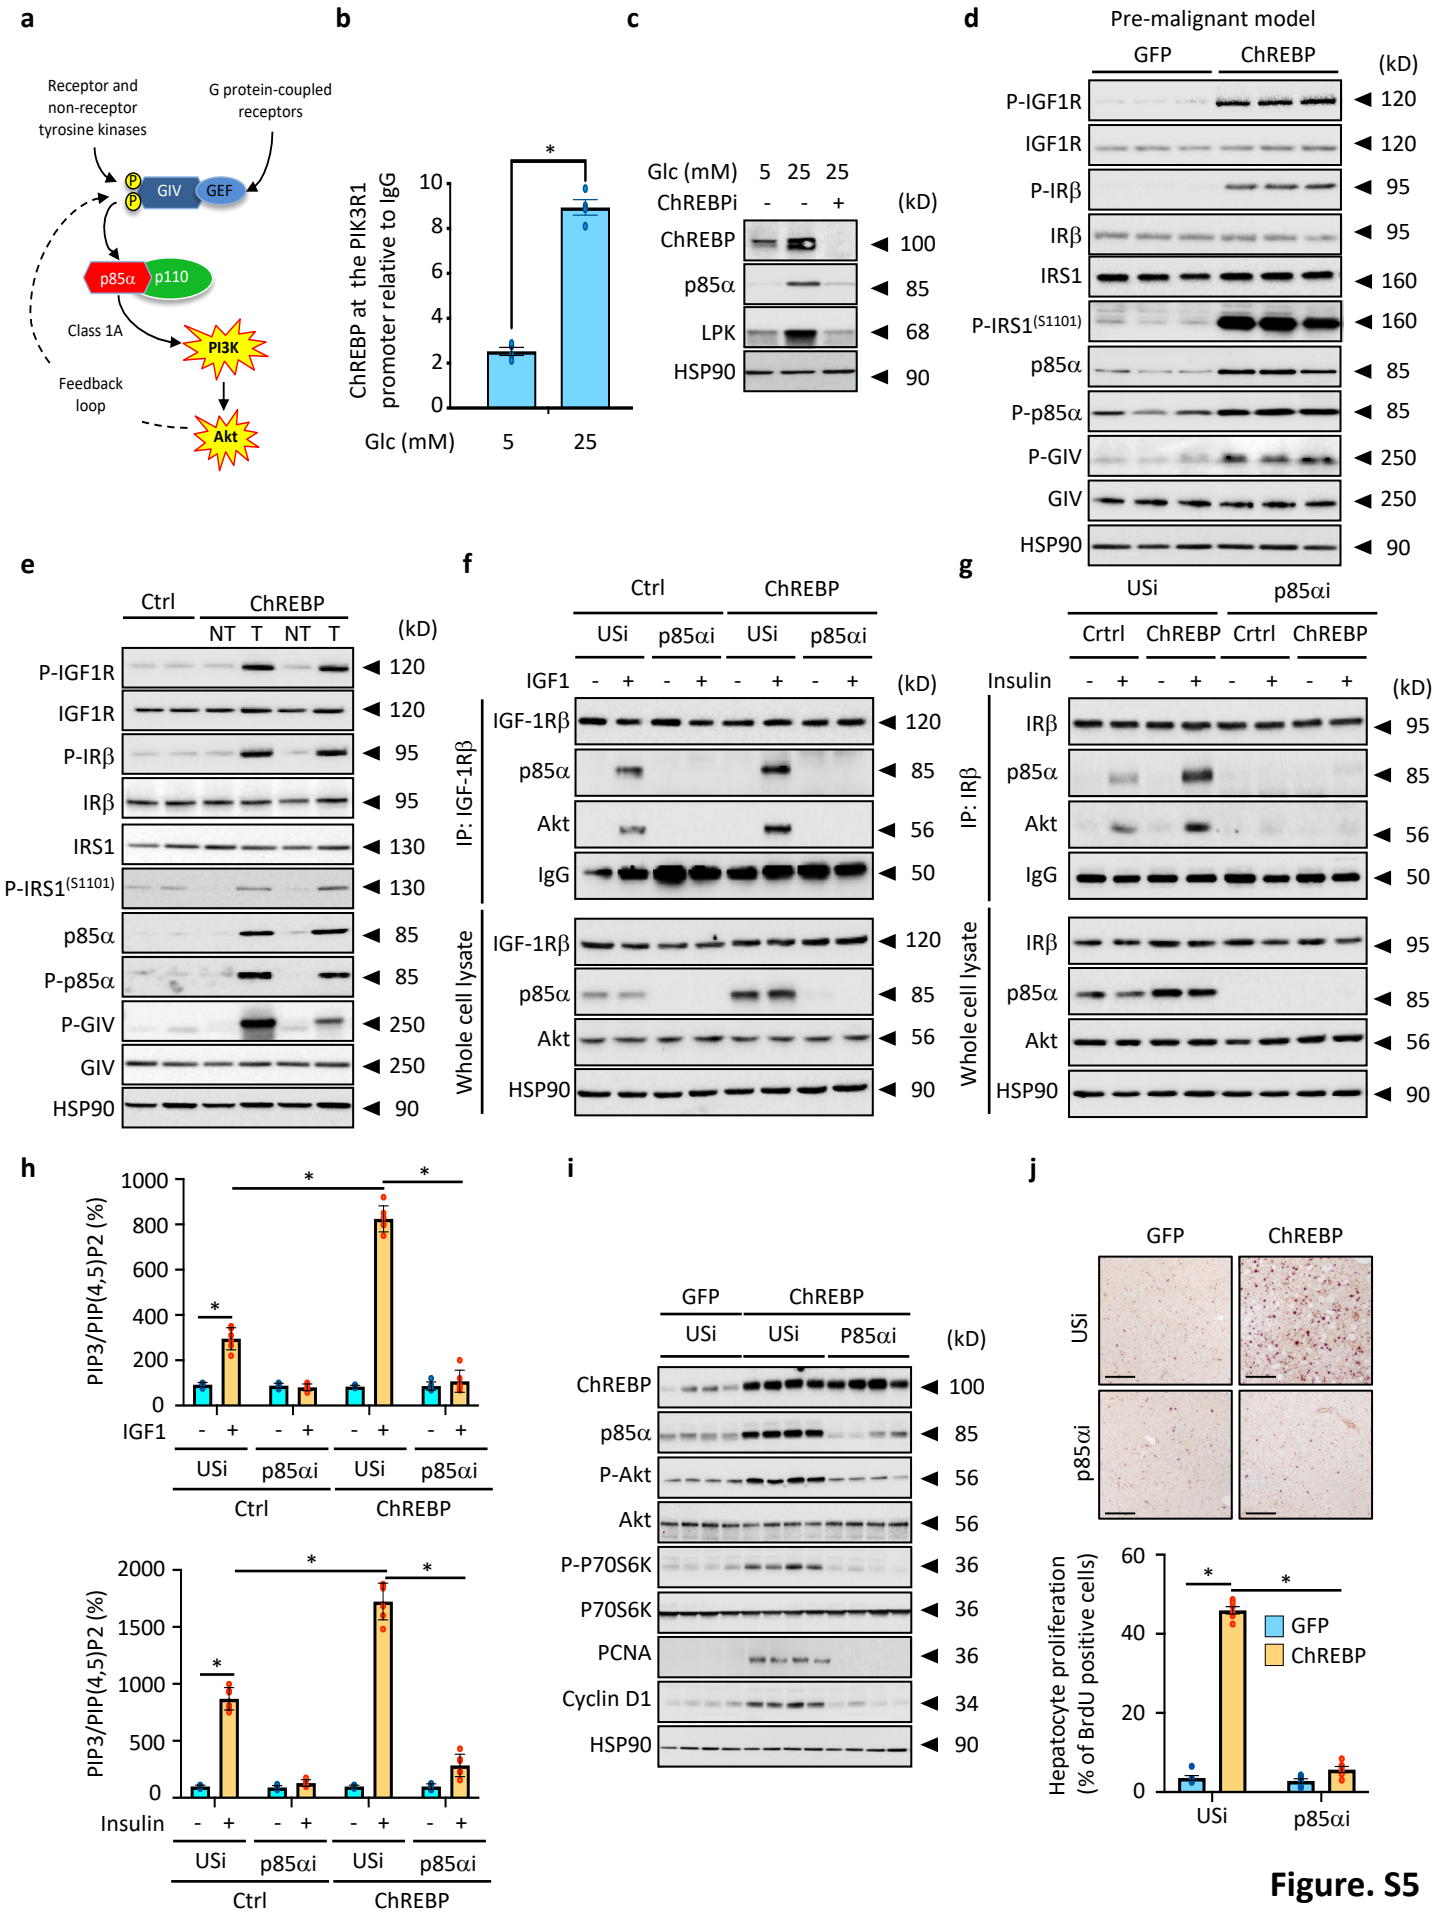

**Supplementary Figure 5.** p85 $\alpha$  drives the stimulatory effects of ChREBP on PI3K/AKT signaling and hepatocyte proliferation. **(a)** Schematic representation of the role of p85 $\alpha$  in controlling PI3K/AKT signaling. **(b)** ChIP experiments measuring ChREBP occupancy at the *Pik3r1* promoter relative to IgG controls in response to glucose stimulation (5 or 25 mM for 24h) in cultured hepatocytes (n = 4 independent experiments). **(c)** ChREBP expression was inhibited in cultured hepatocytes incubated with 5 or 25 mM glucose and with 100 nM insulin for 24h. Representative Western blot of ChREBP and p85 $\alpha$  expression is shown (n = 4 independent experiments). **(d)** *Mice*, injected with either GFP or ChREBP overexpressing adenovirus, were studied 3 weeks later. Representative Western blot analysis depicting IGF1R, IR and p85 $\alpha$  activity (n = 10 biologically independent *mice* per group). **(e)** Representative Western blot analysis depicting IGF1R, IR and p85 $\alpha$  activity in ChREBP overexpressing tumors (n = 10 biologically independent *mice* per group). **(f and g)** p85 $\alpha$  stabilizes activated IGF1R or IR receptors / AKT complexes at the plasma membrane to increase PI3K activity in response to ChREBP overexpression. P85 $\alpha$  expression was stably inhibited, through Crispr/Cas9 approach in Huh7 cell line overexpressing ChREBP. IGF1R **(f)** or IR **(g)**, immunoprecipitated from IGF1 (10 nM, 5 minutes) or insulin (10 nM, 5 minutes) stimulated Huh7 cells, were immunoblotted for IGF1R, IR, p85 $\alpha$  and AKT. (n = 3 independent experiments). **(h)** PI3K activity was determined by measuring the ratio between PIP3 and PI(4,5)P2 levels in Huh7 cells stably overexpressing ChREBP. Huh7 cells were stimulated with either IGF1 (10 nM) or insulin (10 nM) for 5 minutes (n = 3 independent experiments). **(i and j)** P85 $\alpha$  expression was inhibited, through adenoviral-mediated shRNA delivery, in the liver of mice overexpressing ChREBP. **(i)** Representative Western blot analysis of PI3K/AKT signaling and cell cycle (n = 10 biologically independent *mice* per group). **(j)** Representative staining of liver sections with BrdU (top panel). Quantification of the BrdU staining is shown (bottom panel) (n = 10 biologically independent *mice* per group). Scale bars = 100  $\mu$ m. All error bars represent mean  $\pm$  SEM. (b) Statistical analyses were made using unpaired two-sided Student's t-test \*P < 0.001. (h, j) Statistical analyses were made using two-way ANOVA and Tukey's multiple-comparisons test. \* P < 0.01.

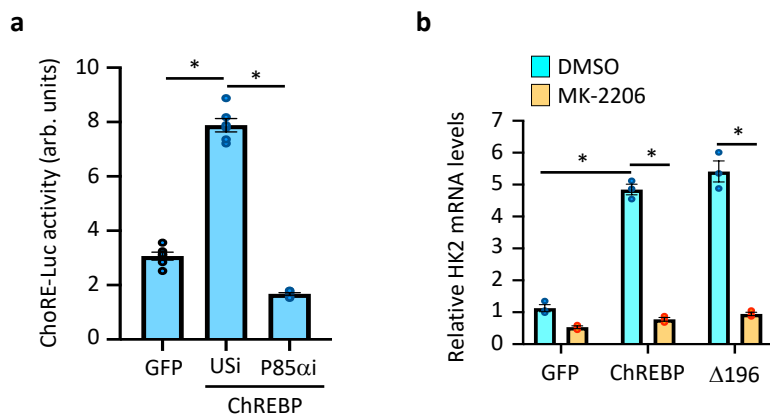

**Supplementary Figure 6.** Hexokinase 2 is a part of an amplification loop linking glucose mediated ChREBP activation with enhanced PI3K/AKT signaling. **(a)** C57BL6/J male *mice* were injected with either GFP or ChREBP overexpressing adenovirus. Simultaneously, P85 $\alpha$  expression was also inhibited through adenoviral-mediated shRNA delivery. *Mice* were study 3 weeks later. **(a)** Quantification of ChoRE-Luc activity shown in Figure 5a (n = 6 biologically independent *mice* per group). **(b)** FLAG tagged WT or HA tagged  $\Delta$ 196 isoforms of ChREBP were overexpressed in Huh7 cells. Cells were then treated with 100 nM of MK-2206 for 24h. **(b)** HK2 expression relative to the TBP gene expression (n = 3 independent experiments). All error bars represent mean  $\pm$  SEM. (a and b) Statistical analyses were made using two-way ANOVA and Tukey's multiple-comparisons test. \* P < 0.01.

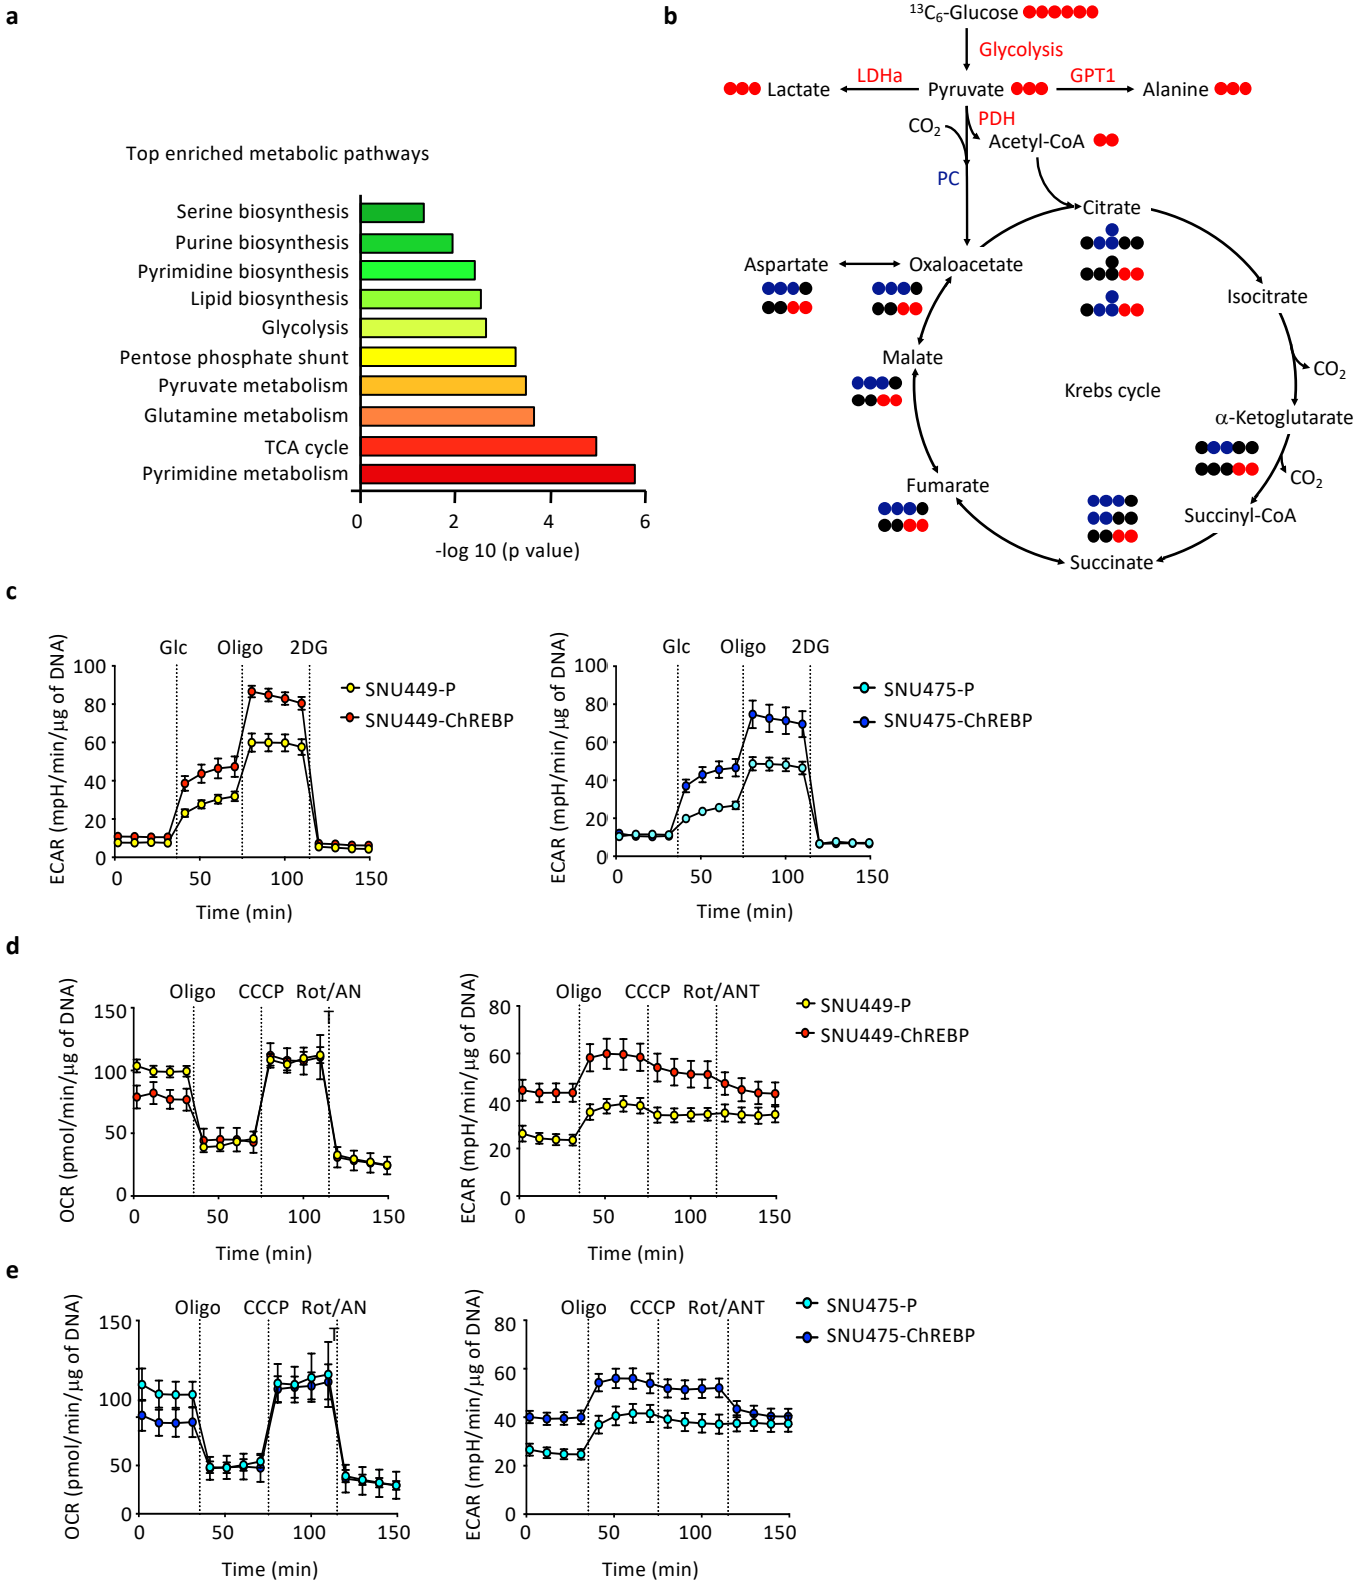

Figure. S7



**Supplementary Figure 7.** Metabolic rewiring of glucose metabolism participates to ChREBP proliferative effects. **(a)** Top ten enriched metabolic pathways from gene ontology analysis performed from ChREBP tumors (n = 12 biologically independent *mice* per group). **(b)** Schematic representation of  $^{13}\text{C}_6$ -glucose isotope tracing into glycolysis and TCA cycle via PDH or PC activity. **(c)** Representative profile after glycolysis stress assay showing the ECAR of parental or ChREBP overexpressing SNU449 (left) and SNU475 cells (right) (n = 9 independent experiments). **(d)** Representative profile after mitochondrial stress assay showing the OCR and ECAR of parental or ChREBP overexpressing SNU449 cells (n = 9 independent experiments). **(e)** Representative profile after mitochondrial stress assay showing the OCR and ECAR of parental or ChREBP overexpressing SNU475 cells (n = 9 independent experiments).

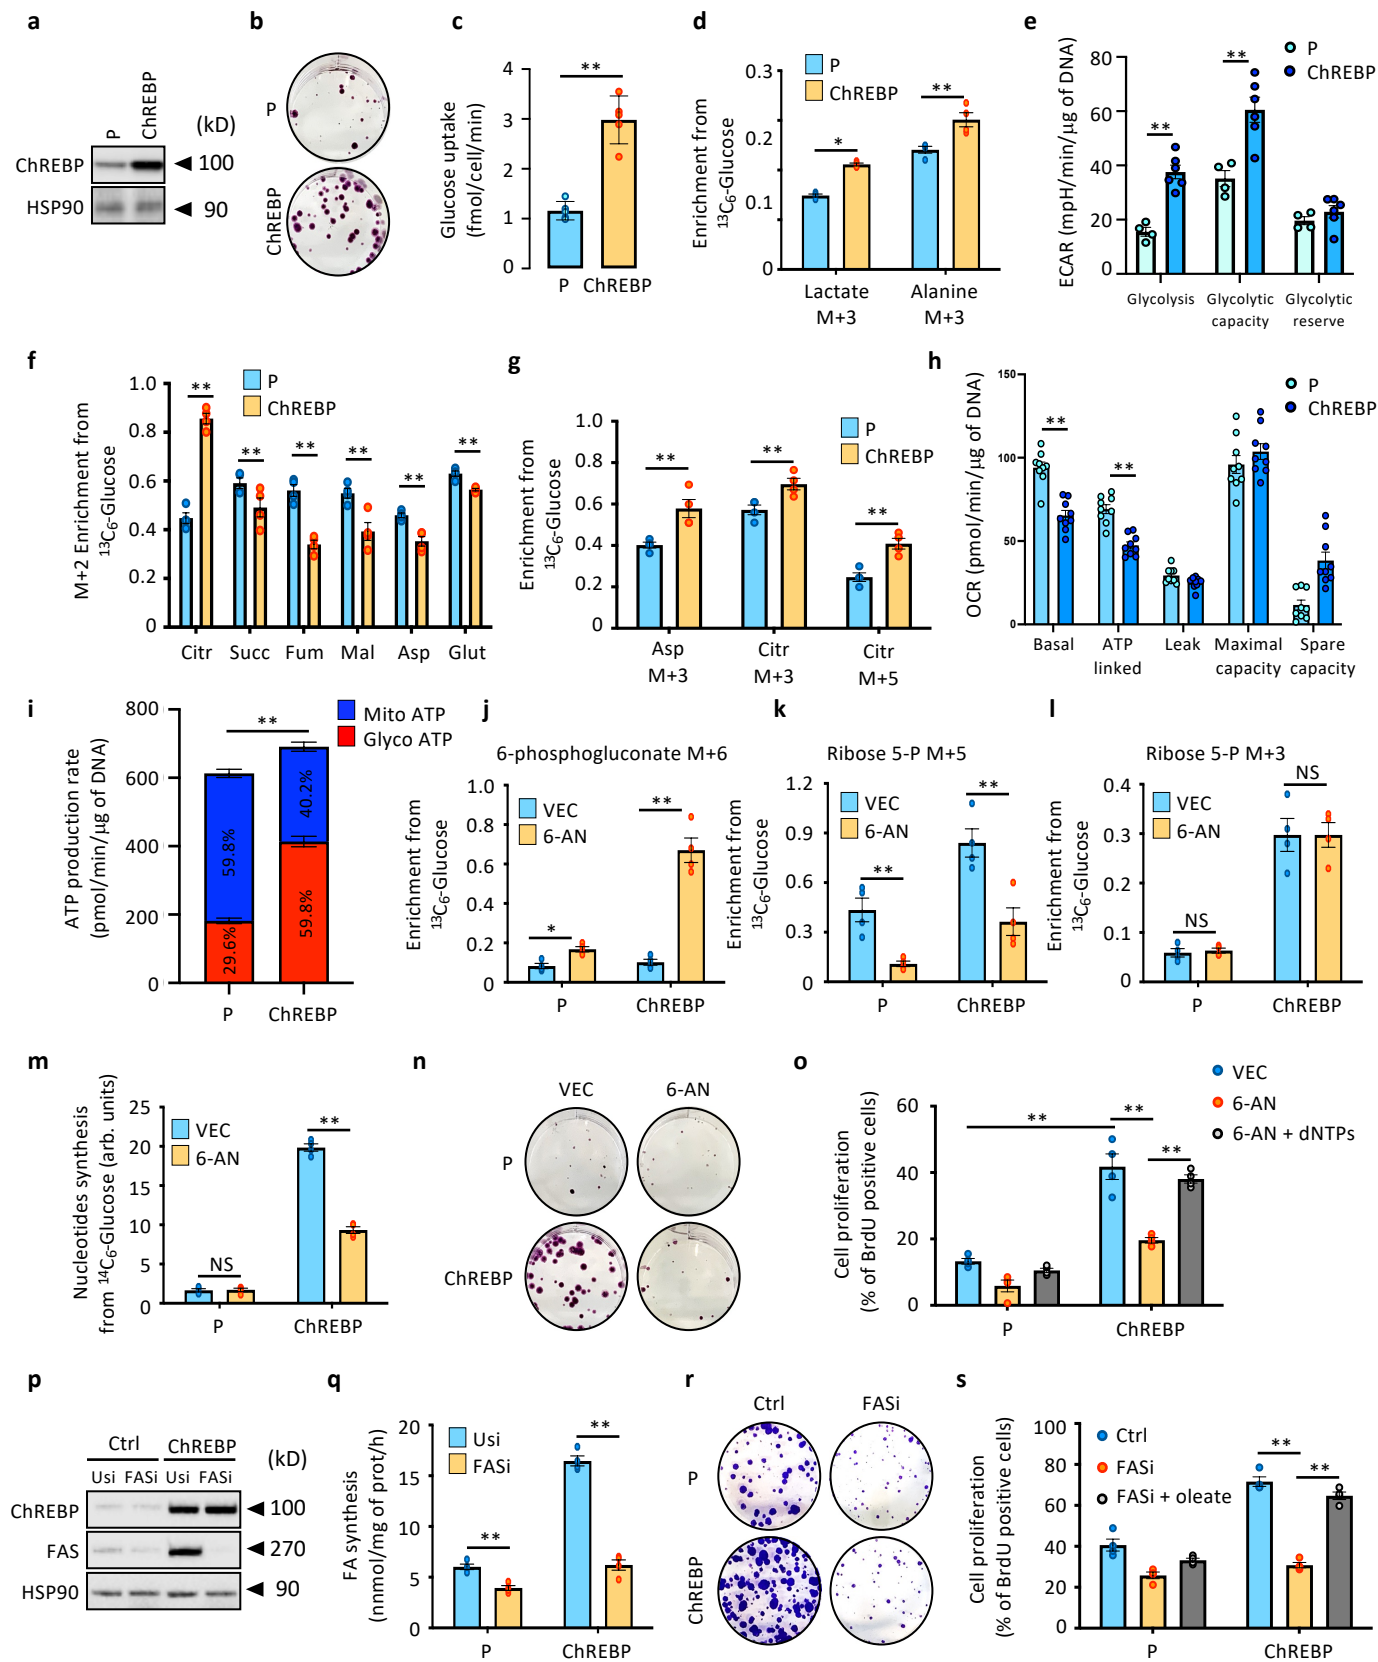

**Figure. S8**

**Supplementary Figure 8.** Metabolic rewiring of glucose metabolism in ChREBP overexpressing SNU475 cells. ChREBP was stably overexpressed using the Crispr/Cas9 technology in SNU475 hepatoma cell line. **(a)** Representative Western blot illustrating stable ChREBP overexpression. **(b)** Representative clonogenic assays shown (n = 3 independent experiments). **(c)** Rate of glucose uptake (n = 5 independent experiments). **(d)** Enrichment in (m+3) lactate and (m+3) alanine from  $^{13}\text{C}_6$ -glucose in parental or ChREBP overexpressing cells (n = 4 independent experiments). **(e)** Graph showing glycolysis, glycolytic capacity, and glycolytic reserve in parental or ChREBP overexpressing SNU475 (n = 9 independent experiments). Representative curve can be found in supplementary Figure 7c. **(f)** (m+2) enrichment in citrate (citr), succinate (succ), fumarate (fum), malate (mal), aspartate (asp) and glutamate (glut) from  $^{13}\text{C}_6$ -glucose in parental or ChREBP overexpressing SNU475 (n = 4 independent experiments). **(g)** Enrichment in (m+3) aspartate, (m+3) citrate and (m+5) citrate from  $^{13}\text{C}_6$ -glucose in parental or ChREBP overexpressing SNU475 (n = 4 independent experiments). **(h)** Graph showing basal OCR, proton leakage, maximal respiration, spare capacity, and ATP production of SNU475 overexpressing ChREBP (n = 9 independent experiments). Representative profile after mitochondrial stress assay showing the OCR of these SNU475 cells can be found in supplementary Figure 6e. **(i)** ATP production rate from glycolysis or oxidative phosphorylation from parental or ChREBP overexpressing SNU475 cells (n = 9 independent experiments). **(j-l)** Parental and ChREBP overexpressing SNU475 cells were treated with 6-AN (6-aminonicotinamide, 40  $\mu\text{M}$ ) for 24h. Cells were then incubated for 30 min with 11 mM of  $^{13}\text{C}_6$ -glucose. **(j)** Enrichment in (m+6) 6-phosphogluconate from  $^{13}\text{C}_6$ -glucose (n = 4 independent experiments). **(k)** Enrichment in (m+5) ribose 5-phosphatate from  $^{13}\text{C}_6$ -glucose in response to ChREBP overexpression (n = 4 independent experiments). **(l)** Enrichment in (m+3) ribose 5-phosphatate from  $^{13}\text{C}_6$ -glucose in parental or ChREBP overexpressing SNU475 (n = 4 independent experiments). **(m)** *De novo* nucleotide synthesis from parental and ChREBP overexpressing SNU475 cells incubated 6h with 11 mM of  $^{14}\text{C}_6$ -labelled glucose (n = 4 independent experiments). **(n)** Effect of 6-AN treatment on ChREBP-mediated increase in hepatocyte proliferation was studied in SNU475 cells. Representative clonogenic assays shown (n = 7 independent experiments). **(o)** Effect of 6-AN treatment (40  $\mu\text{M}$ , 24h) and dNTPs rescue (100  $\mu\text{M}$  each) on ChREBP-mediated increase in cell proliferation. Cell proliferation index was determined by measuring the % of BrdU positive SNU475 cells (n = 4 independent experiments). **(p-s)** FAS expression was knockdown in ChREBP overexpressing SNU449 cells by Crispr/Cas9. **(p)** Representative Western blot showing FAS deletion in ChREBP overexpressing SNU475 (n = 3 independent experiments). **(q)** *De novo* lipid synthesis from  $^{14}\text{C}_6$ -labelled glucose. SNU475 cells were incubated 6h with 11 mM of  $^{14}\text{C}_6$ -labelled glucose (n = 3 independent experiments). **(r)** Representative clonogenic assays shown after FAS deletion (n = 3 independent experiments). **(s)** Effect of FAS knockdown and oleate supplementation (50  $\mu\text{M}$ ) on ChREBP-mediated increase in cell proliferation. Cell proliferation index was determined by measuring the % of BrdU positive cells (n = 4 independent experiments). All error bars represent mean  $\pm$  SEM. (c, d, e, f, g, h, i) Statistical analyses were made using unpaired two-sided Student's t-test \* P < 0.05. \*\*P < 0.001. (j, k, l, m, o, q, s) Statistical analyses were made using two-way ANOVA and Tukey's multiple-comparisons test. \* P < 0.05. \*\* P < 0.001. NS = non-significant.

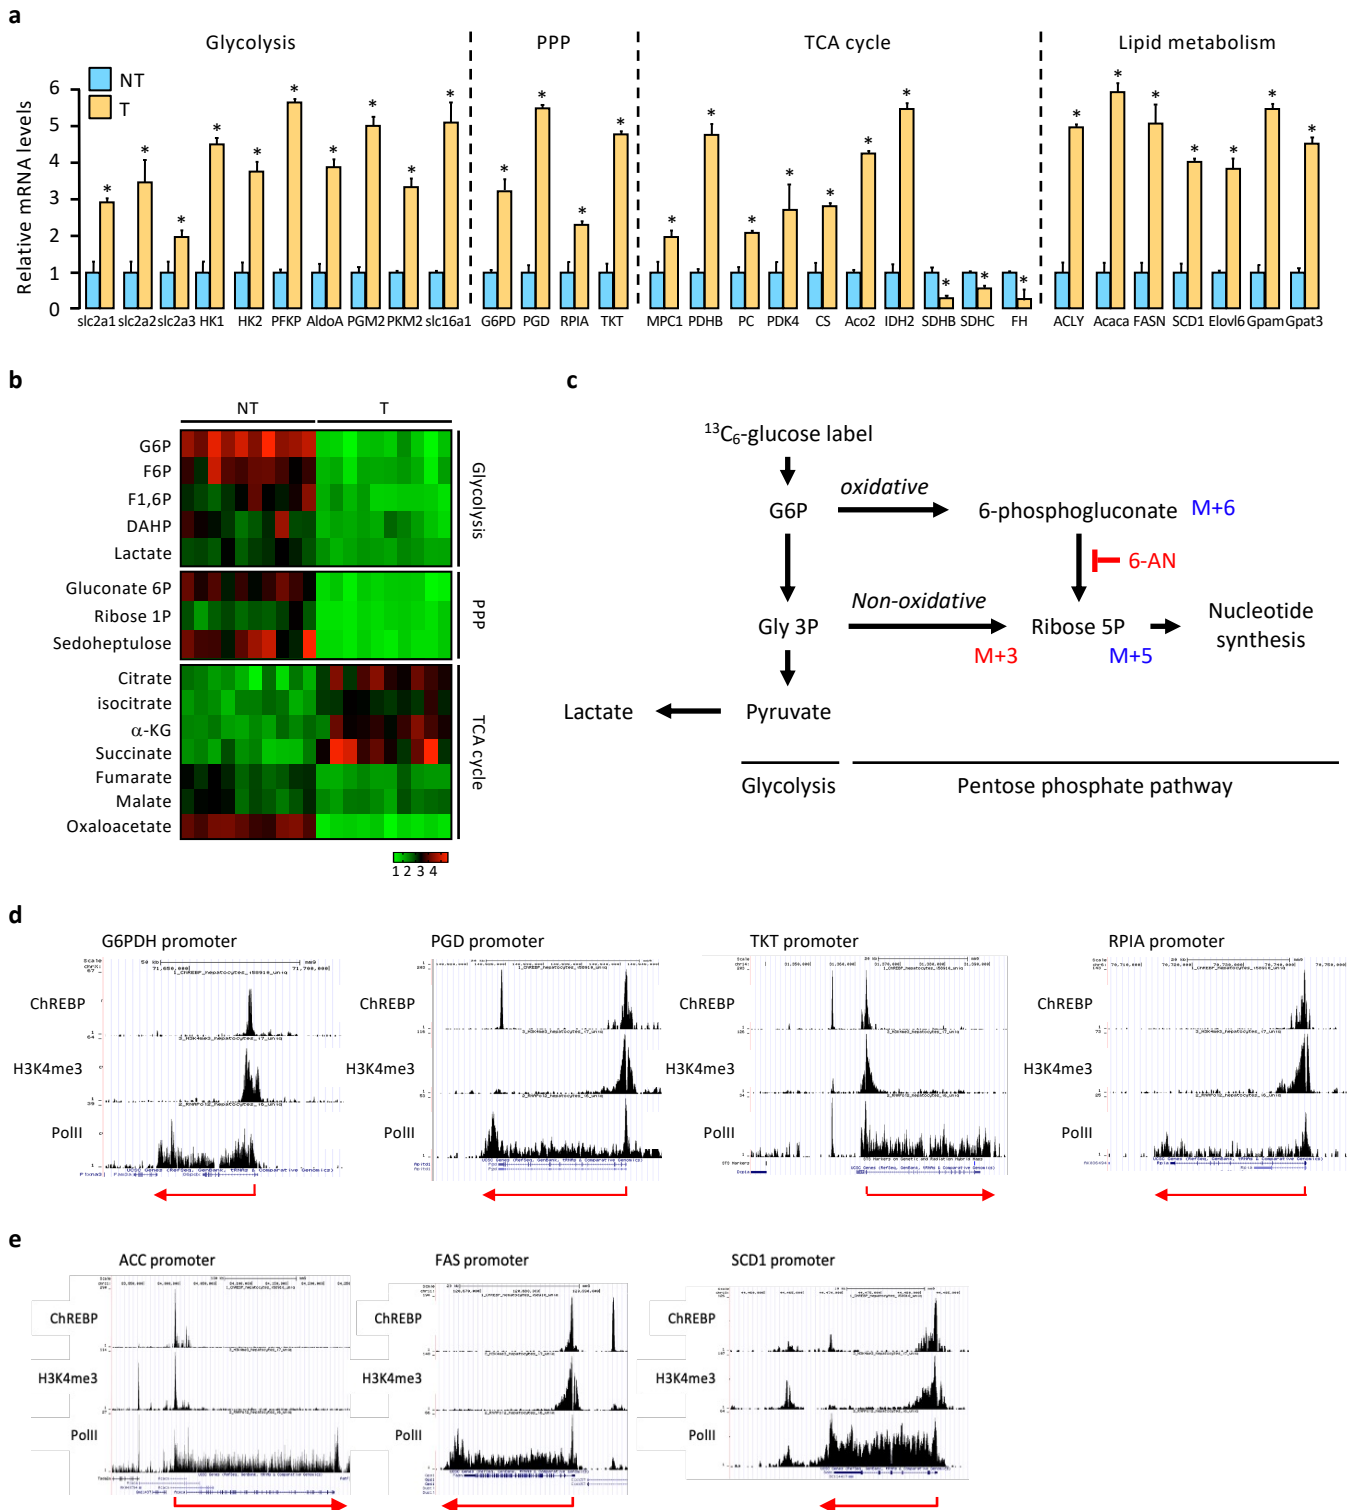

Figure. S9

**Supplementary Figure 9.** Metabolic rewiring of glucose metabolism in ChREBP overexpressing tumors. **(a)** Relative expression of glycolytic, PPP, TCA cycle and lipogenic genes in ChREBP tumors. The expression of a specific gene was normalized to TBP mRNA levels (n = 12 biologically independent *mice* per group). **(b)** Heatmap of glycolytic, PPP and TCA cycle metabolic intermediates between NT and T samples (n = 10 biologically independent *mice* per group). **(c)** Schematic representation of  $^{13}\text{C}_6$ -glucose isotope tracing into the pentose phosphate shunt. **(d)** UCSC genome browser image illustrating normalized tag counts for ChREBP, H3K4me3 and RNA polIII at the promoter of G6PDH, PGD, TKT and RPIA. **(e)** UCSC genome browser image illustrating normalized tag counts for ChREBP, H3K4me3 and RNA polIII at the promoter of lipogenic genes. All error bars represent mean  $\pm$  SEM. (a) Statistical analyses were made using unpaired two-sided Student's t-test. \* P < 0.01.

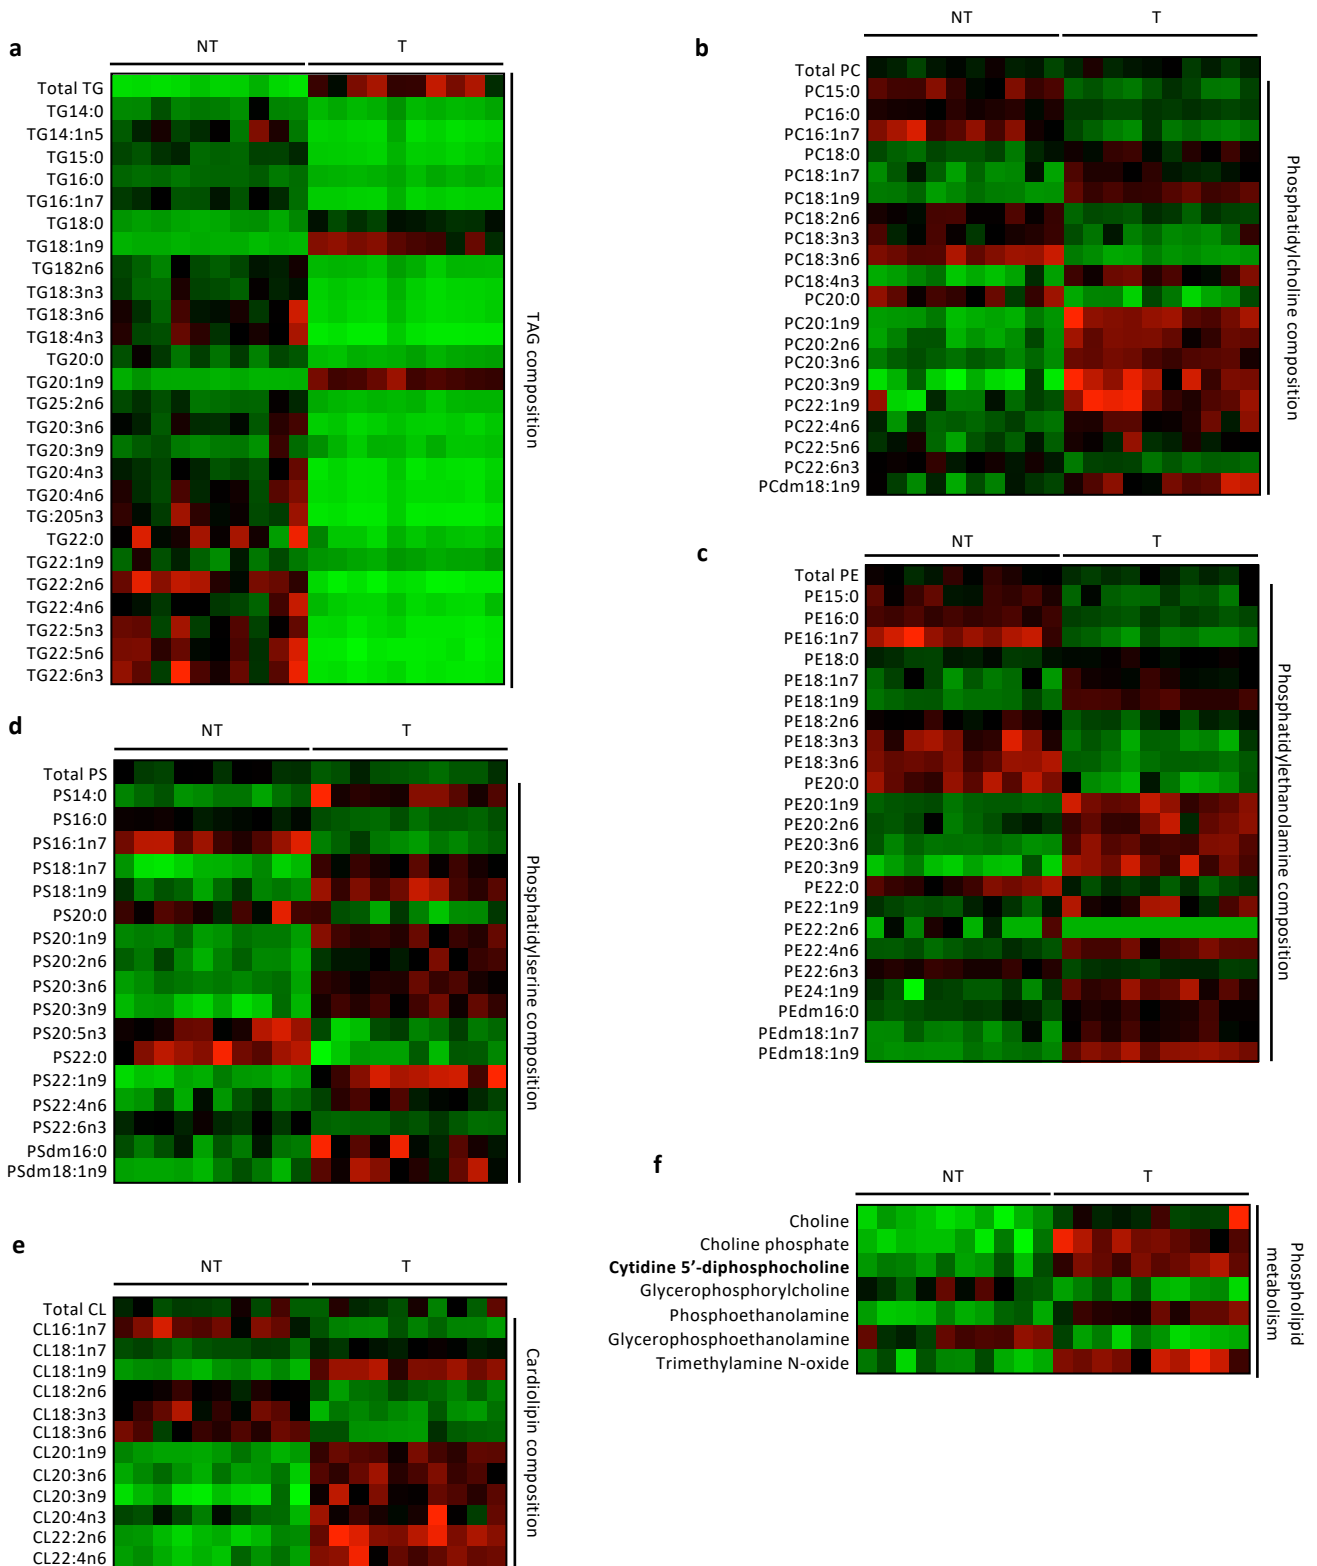

Figure. S10

**Supplementary Figure 10. (a-e)** Heatmap visualization of relative SFA, MUFA, and PUFA content in triglycerides (TG) **(a)** and phospholipid species including phosphatidylcholine (PC) **(b)**, phosphatidylethanolamine (PE) **(c)**, phosphatidylserine (PS) **(d)** and cardiolipin (CL) **(e)** in ChREBP tumors (T) compared to non-tumoral tissue (NT). Total content of each lipid species is indicated in the first line of each heatmap (n = 15 biologically independent *mice* per group). **(f)** Heatmap of metabolic intermediates of phospholipid metabolism between NT and T samples (n = 15 biologically independent *mice* per group).

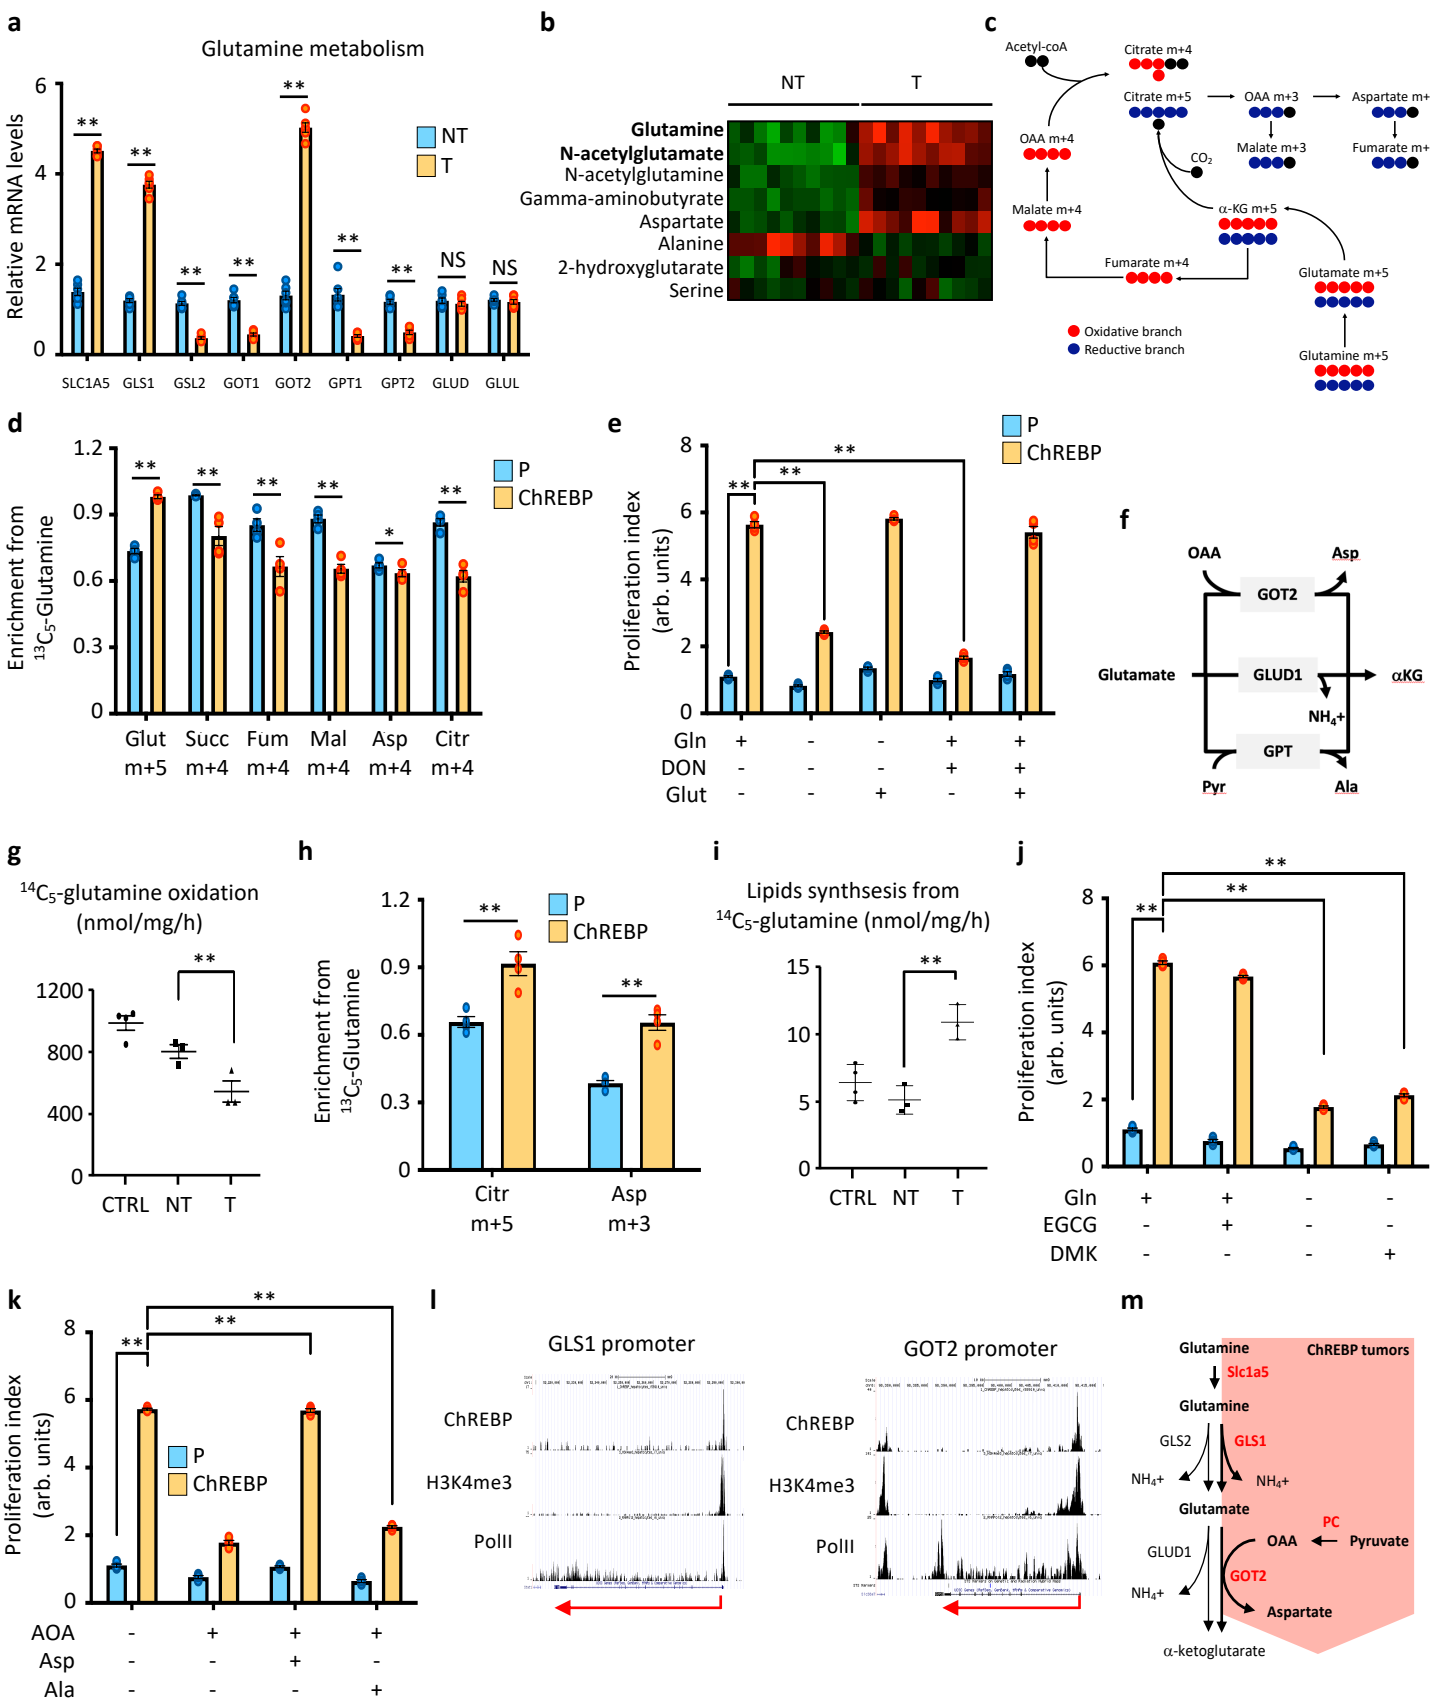

Figure. S11



**Supplementary Figure 11.** Metabolic rewiring of glutamine metabolism in response to ChREBP overexpression. **(a)** Relative expression of genes involved in glutamine metabolism in ChREBP tumors. The expression of a specific gene is normalized to TBP mRNA levels (n = 12 biologically independent *mice* per group). **(b)** Heatmap of metabolic intermediates of Gln metabolism in ChREBP tumors (n = 10 biologically independent *mice* per group). **(c)** Schematic representation of  $^{13}\text{C}_5$ -glutamine isotope tracing into the TCA cycle via oxidative or reductive metabolism. **(d)** (m+5) enrichment in glutamate, (m+4) succinate, (m+4) fumarate, (m+4) malate, (m+4) aspartate and (m+4) citrate from  $^{13}\text{C}_5$ -glutamine in parental or ChREBP overexpressing SNU475 cells (n = 4 independent experiments). **(e)** Proliferation index of SNU475 cells overexpressing ChREBP after Gln deprivation or GLS inhibition (n = 4 independent experiments). Glutamate (Glu) 4 mM. **(f)** Schematic representation of mitochondrial Glut metabolism involving GLUD1, GOT2 and GPT2. **(g)** Gln oxidation rate determined by measuring the production of  $^{14}\text{CO}_2$  from  $^{14}\text{C}_5$ -Gln for 4h (n = 6 biologically independent *mice* per group). **(h)** Enrichment in (m+3) citrate and (m+3) aspartate from  $^{13}\text{C}_5$ -glutamine in parental or ChREBP overexpressing SNU475 cells (n = 4 independent experiments). **(i)** Measurement of *de novo* lipid synthesis from  $^{14}\text{C}_5$ -labelled Gln in ChREBP tumors (n = 3 biologically independent *mice* per group). **(j)** Proliferation index of SNU475 cells overexpressing ChREBP after GLUD1 inhibition (n = 4 independent experiments). **(k)** Proliferation index of SNU475 cells overexpressing ChREBP after AOA treatment (n = 4 independent experiments). **(l)** UCSC genome browser image illustrating normalized tag counts for ChREBP, H3K4me3 and RNA polII at the promoter of GLS1 and GOT2. **(m)** Schematic representation of Gln metabolic rerouting in response to ChREBP activation. All error bars represent mean  $\pm$  SEM. (a, d, h) Statistical analyses were made using unpaired two-sided Student's t-test. \* P < 0.05. \*\* P < 0.01. (e, g, i, j, k) Statistical analyses were made using two-way ANOVA and Tukey's multiple-comparisons test. \*\* P < 0.001.

**a**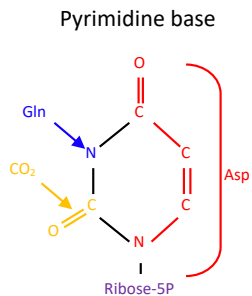**b**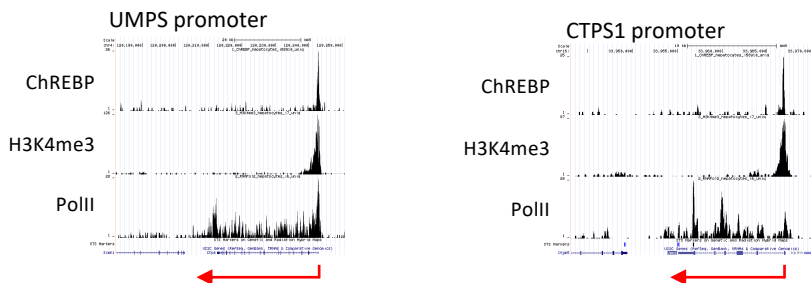**c**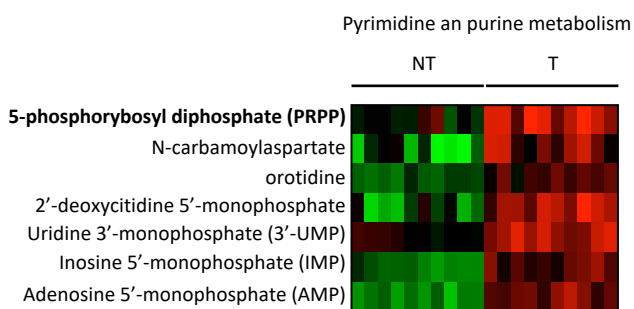**d**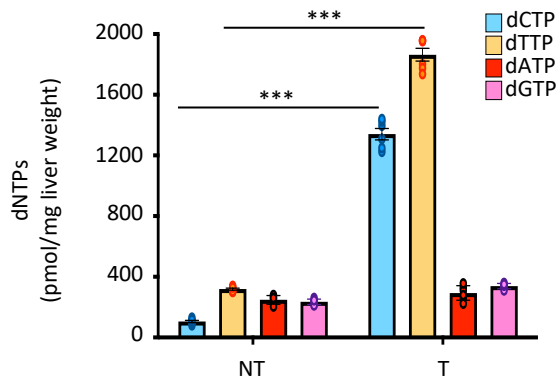**e**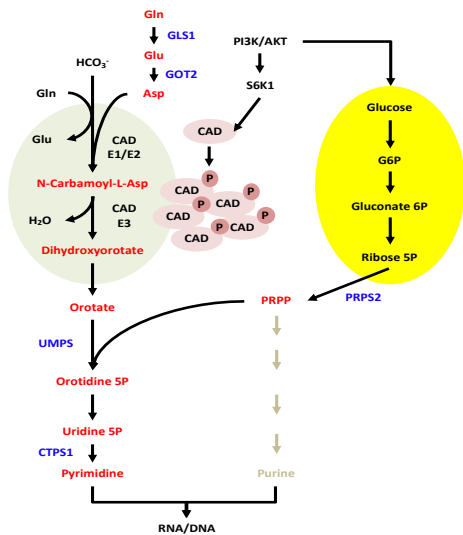

**Supplementary Figure 12.** ChREBP favors tumor growth by channeling glutamine metabolism into *de novo* pyrimidine synthesis. **(a)** Sketch illustrating how Gln, Asp and glucose are used in the process of *de novo* pyrimidine synthesis, Asp being the carbon donor. **(b)** UCSC genome browser image illustrating normalized tag counts for ChREBP, H3K4me3 and RNA polIII at the promoter of UMPS and CTPS1. **(c)** Heatmap of metabolic intermediates of pyrimidine synthesis in ChREBP overexpressing tumors (n = 10 biologically independent *mice* per group). **(d)** dNTP pools measured by HPLC in ChREBP overexpressing tumors (n = 6 biologically independent *mice* per group) **(e)** Illustration of the role of ChREBP in controlling glucose, Gln and Asp metabolism to support *de novo* pyrimidine synthesis. All error bars represent mean  $\pm$  SEM. (d) Statistical analyses were made using two-way ANOVA and Tukey's multiple-comparisons test. \*\*\* P < 0.001.

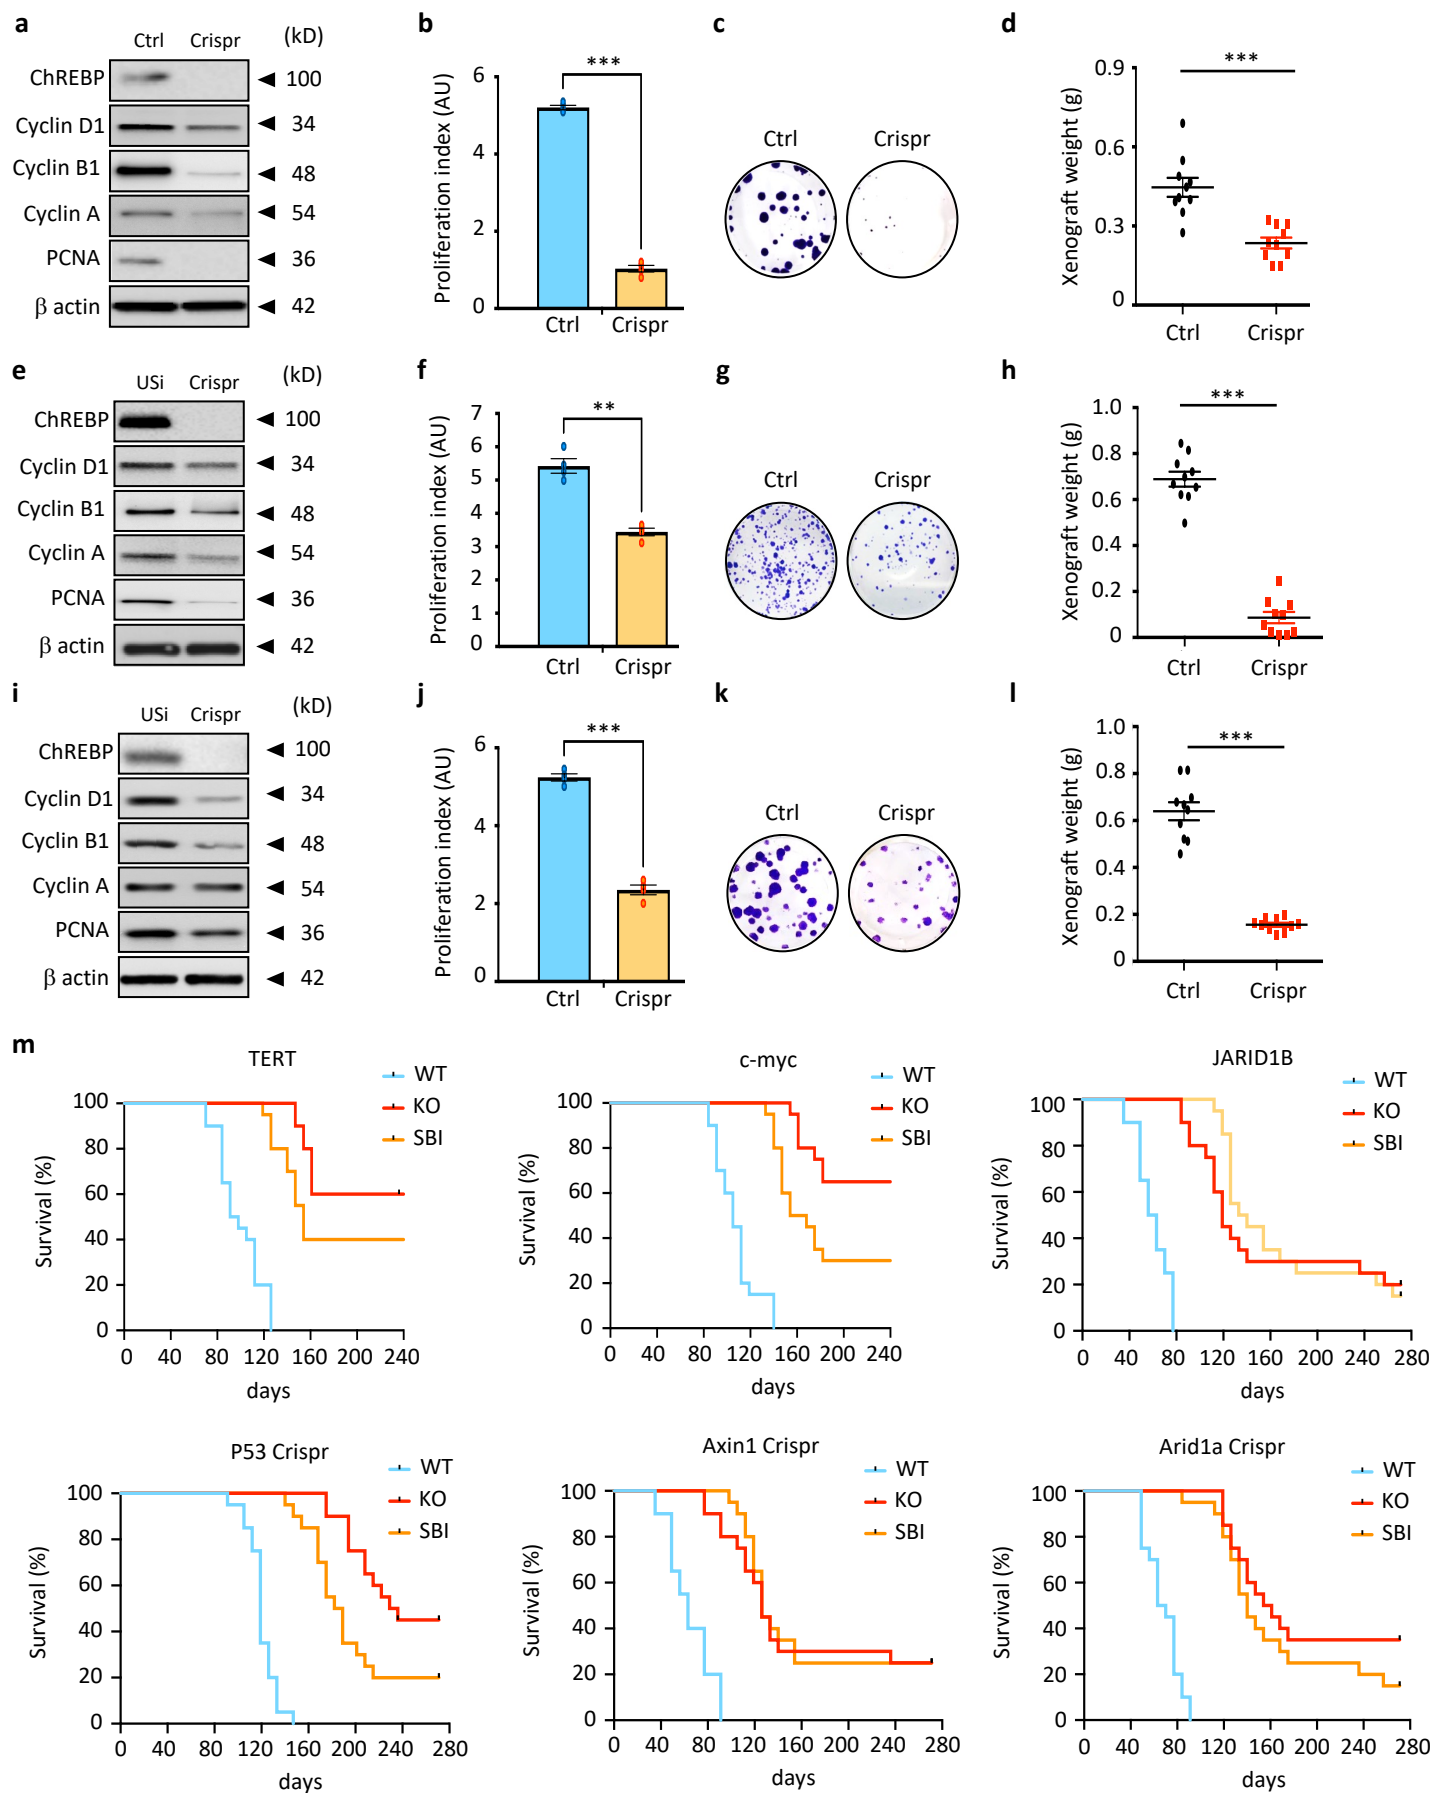

**Figure. S13**

**Supplementary Figure 13.** ChREBP represents a promising target for HCC treatment. **(a-l)** ChREBP expression was stably inhibited in SNU475, Huh7 and Bnl cl.2 cells using the Crispr/Cas9 approach. **(a, e and i)** Representative Western blot analysis of cell cycle proteins in SNU475 (a), Huh7 (e) and Bnl cl.2 (i) deficient for ChREBP (n = 3 independent experiments). **(b, f and j)** Proliferation index of ChREBP deficient SNU475 (b), Huh7 (f) and Bnl cl.2 (j) cells (n = 4 independent experiments). **(c, g and k)** Representative clonogenic assays from ChREBP deficient SNU475 (c), Huh7 (g) and Bnl cl.2 (k) cells (n = 7 independent experiments). **(d, h and l)** Xenograft mouse model of HCC established in nude *mice* using parental and ChREBP deficient SNU475 (d), Huh7 (h) and Bnl cl.2 (l) cells. Representative tumor weight shown at 3 weeks for each cell types (n = 10 biologically independent *mice* per group). **(m)** Kaplan–Meier analysis depicting *mice* overall survival rate in response to TERT, c-myc and JARID1B overexpression or in response to p53, axin1 and arid1a knockdown in liver-specific ChREBP KO mice or in response to SBI-993 treatment. Number of *mice* at risk at the specific time point can be found in the Source data file. All error bars represent mean  $\pm$  SEM. (b, d, f, h, j, l) Statistical analyses were made using unpaired two-sided Student's t-test. \*\*\* P < 0.001. (m) Significant difference in survival between cohorts was calculated using the log-rank (Mantel Cox) test.

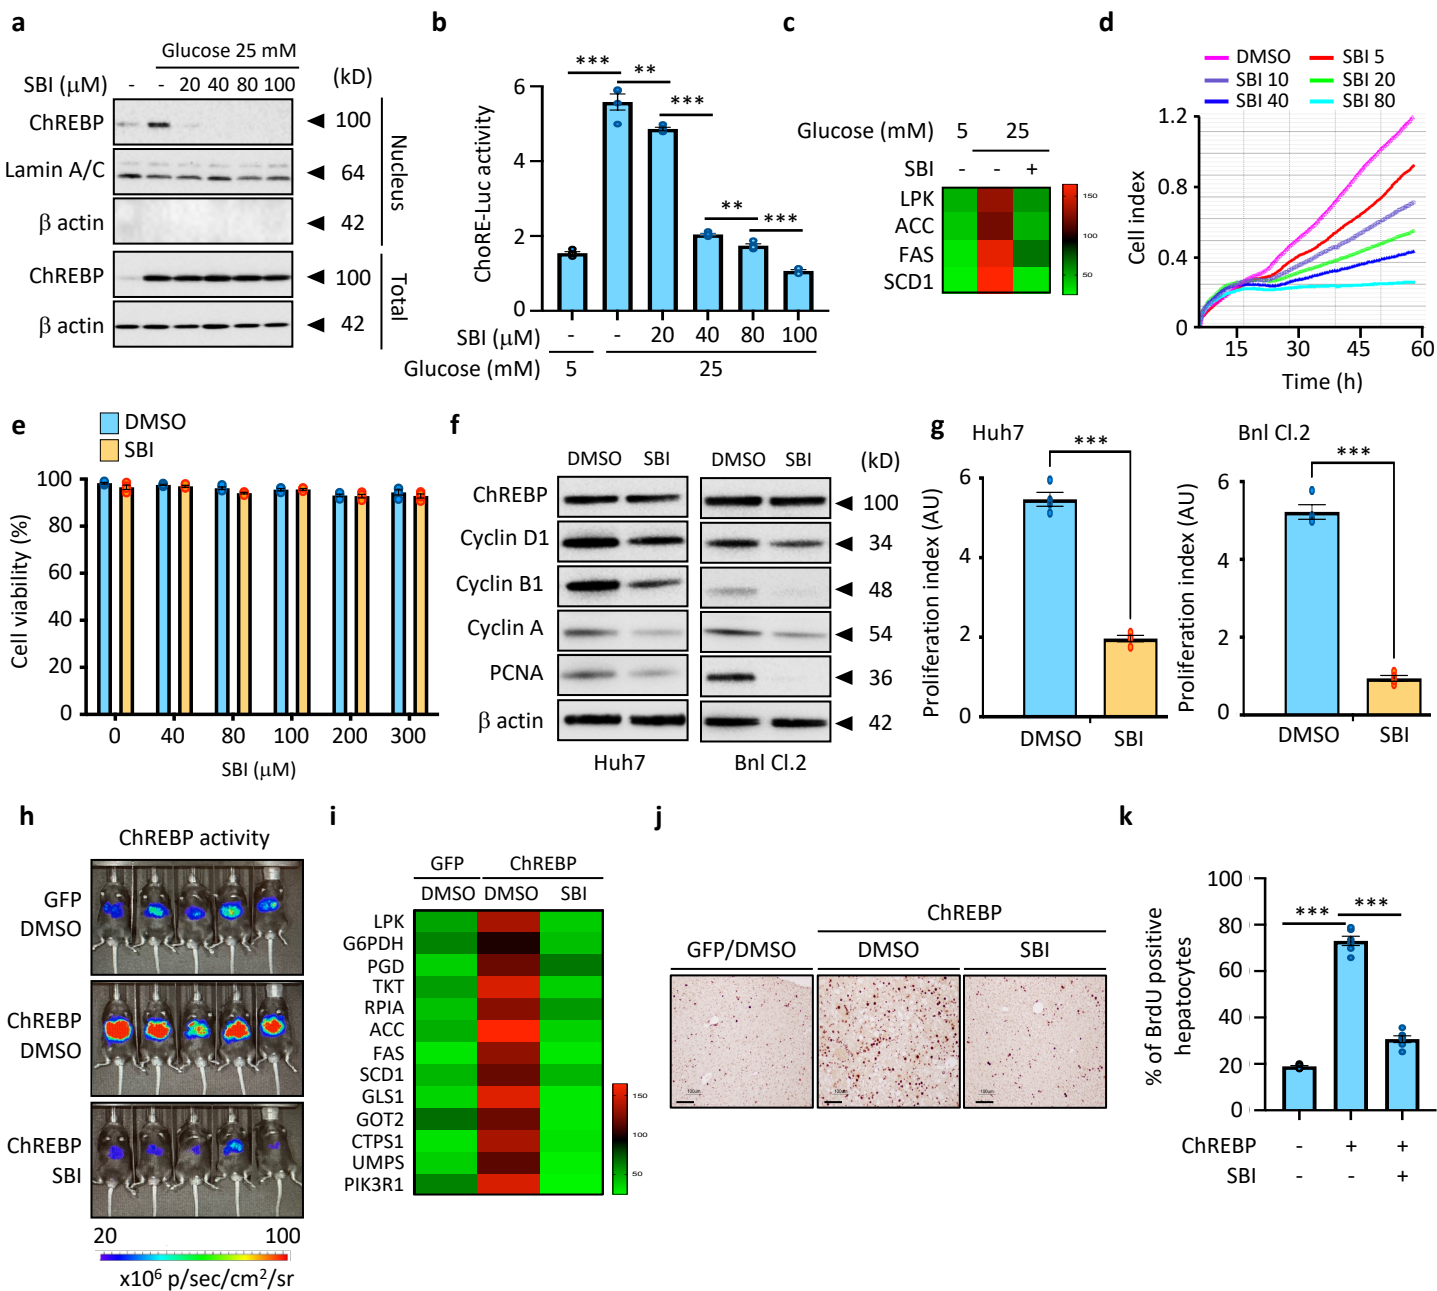

Figure. S14

**Supplementary Figure 14.** SBI-993 treatment significantly inhibits ChREBP activity and cell proliferation. **(a)** Representative Western blot analyzing the effect of SBI-993 on ChREBP nuclear translocation in primary cultured hepatocytes (n = 3 independent experiments). **(b)** Measurement of ChREBP transcriptional activity in primary cultured hepatocytes in response to SBI-993 treatment (n = 3 independent experiments). **(c)** Expression of ChREBP-regulated genes in response to glucose (25 mM) stimulation and SBI-993 (40  $\mu$ M) treatment in primary cultured hepatocytes (n = 3 independent experiments). **(d)** Proliferation index of parental SNU449 cells in response to SBI-993 treatment (n = 3 independent experiments). **(e)** Effect of SBI-993 on SNU449 cell viability measured using CCK8 assay (n = 3 independent experiments). **(f)** Representative Western blot analysis of cell cycle proteins in parental Huh7 and Bnl Cl.2 cells treated with SBI-993 (40  $\mu$ M) (n = 3 independent experiments). **(g)** Proliferation index of parental Huh7 and Bnl Cl.2 cells treated with SBI-993 (40  $\mu$ M) (n = 4 independent experiments). **(h-k)** C57Bl6/J male *mice*, infected with either GFP or ChREBP overexpressing adenovirus, were daily IP injected with SBI-993 (50 mg/kg) for 3 consecutive weeks. **(h)** Representative image of ChREBP transcriptional activity on Chore-luc reporter construct *in vivo* (n = 6 biologically independent *mice* per group). **(i)** Expression of ChREBP-regulated genes relative to TBP expression from mice treated with SBI-993 in the form of a heatmap (n = 6 biologically independent *mice* per group). **(j)** Representative staining of liver sections with BrdU (n = 6 biologically independent *mice* per group). Scale bars = 100  $\mu$ m. **(k)** Quantification of the percentage of BrdU positive hepatocytes from the BrdU staining (n = 6 biologically independent *mice* per group). All error bars represent mean  $\pm$  SEM. (g) Statistical analyses were made using unpaired two-sided Student's t-test. \*\*\* P < 0.001. (b, e, k) Statistical analyses were made using two-way ANOVA and Tukey's multiple-comparisons test. \*\* P < 0.01. \*\*\* P < 0.001.

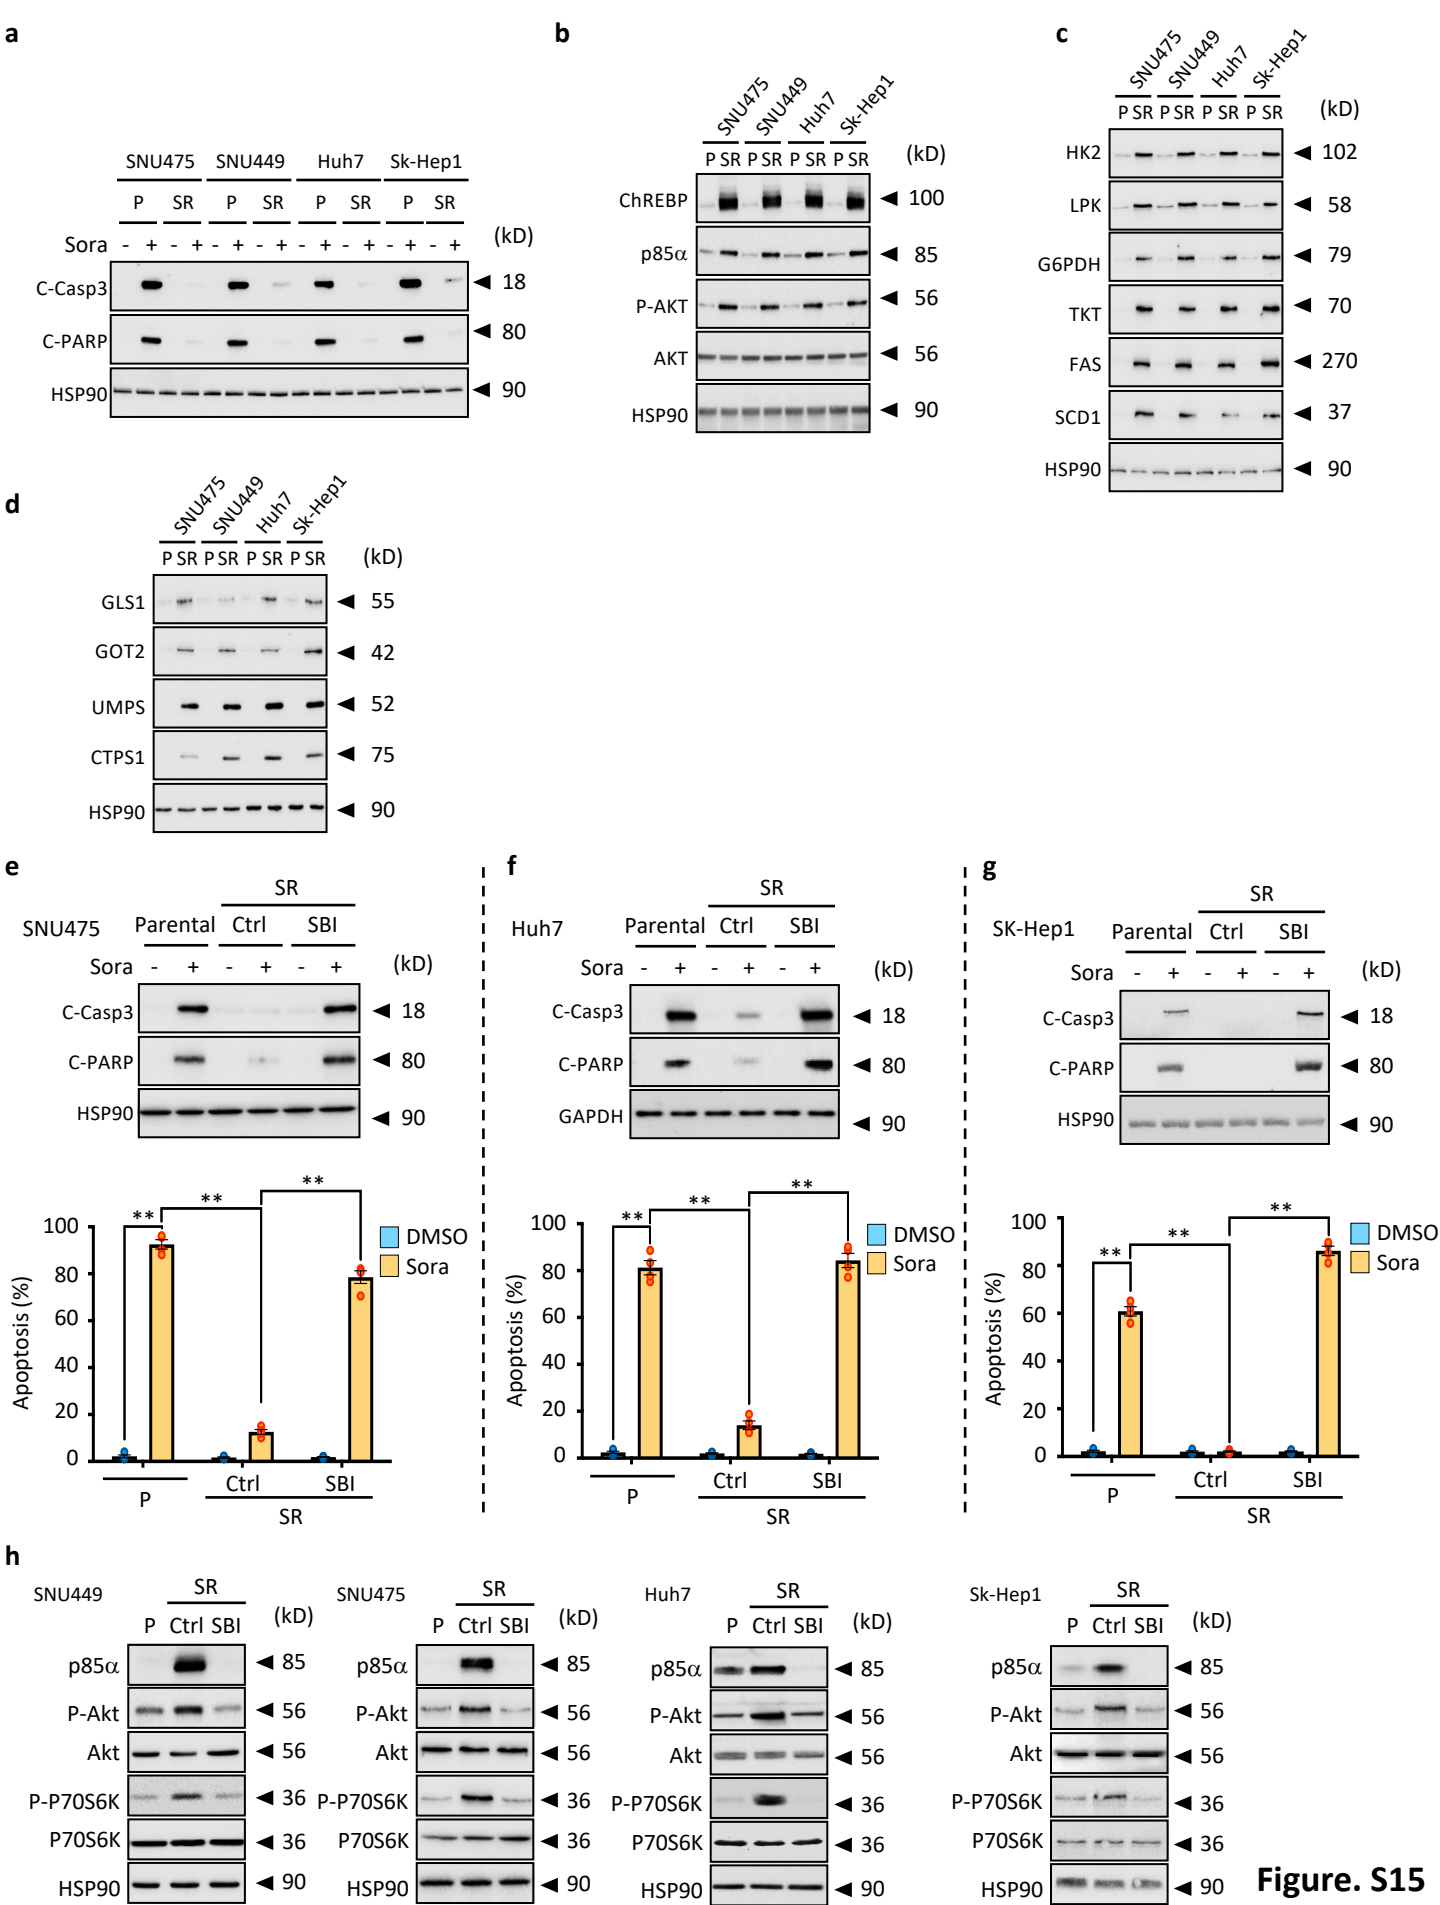

**Figure. S15**



**Supplementary Figure 15.** SBI-993 reverses sorafenib resistance. **(a)** Representative Western blot showing caspase 3 and PARP activity in response to sorafenib treatment (6h, 15  $\mu$ M) on parental or sorafenib resistant SNU475, SNU449, Huh7, and SK-Hep1 cells (n = 3 independent experiments). P (parental), SR (sorafenib resistant clone) **(b)** Representative Western blot of the expression of ChREBP and the activity of the PI3K/AKT signaling pathway in parental or sorafenib resistant SNU475, SNU449, Huh7, and SK-Hep1 cells (n = 3 independent experiments). **(c and d)** Representative Western blot depicting glucose and glutamine metabolic reprogramming in parental or sorafenib resistant SNU475, SNU449, Huh7, and SK-Hep1 cells (n = 3 independent experiments). **(e-g)** Effect of SBI-993 and sorafenib co-treatment on SR-SNU475 (left panel), SR-Huh7 (middle panel) and SK-Hep1 (right panel) cell apoptosis. (Top panel) Representative Western blot depicting caspase 3 and PARP activity in indicated cell lines treated with sorafenib alone or in combination with SBI-993 (n = 3 independent experiments). (Bottom panel) Measurement of cell apoptosis (n = 4 independent experiments). **(h)** Representative Western blot depicting the effect of SBI-993 on PI3K/AKT signaling in SR-SNU449, SR-SNU475, SR-Huh7 and SR-SK-Hep1 cells (n = 3 independent experiments). All error bars represent mean  $\pm$  SEM. Statistical analyses were made using two-way ANOVA and Tukey's multiple-comparisons test. \*\* P < 0.01.

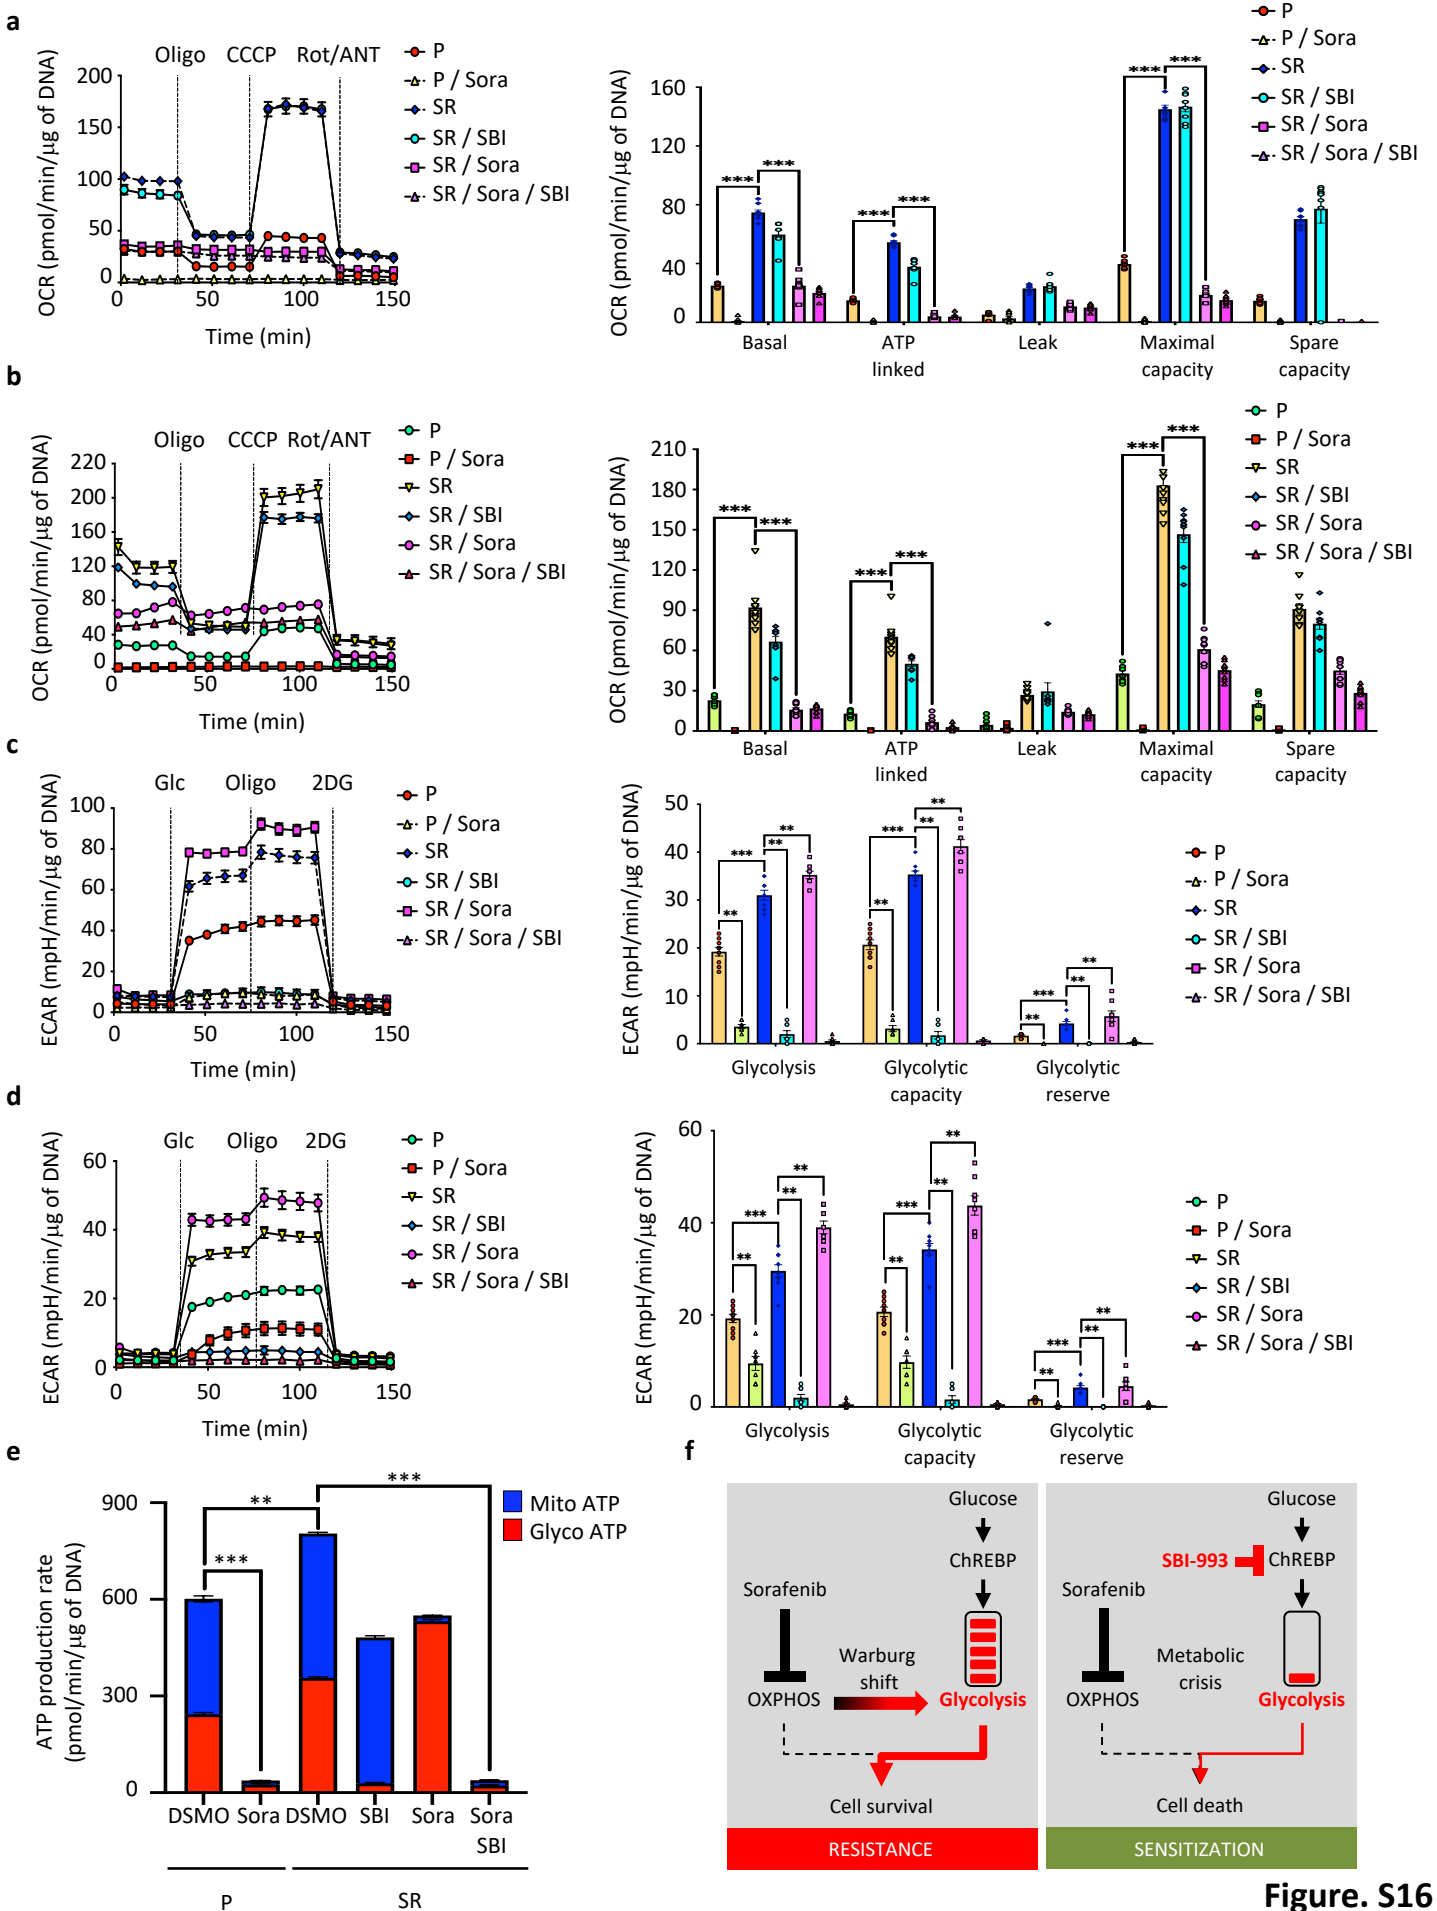

Figure. S16

**Supplementary Figure 16.** SBI-993 reverses sorafenib resistance by preventing metabolic flexibility upon sorafenib treatment. Parental and sorafenib resistant SNU449 and SNU475 cells were incubated 6h with sorafenib (15  $\mu$ M) prior to the characterization of their mitochondrial and glycolytic functions. SR-SNU449 and SR-SNU475 were pre-incubated or not with SBI-993 (40  $\mu$ M) for 24h before sorafenib treatment. **(a)** (left panel) Representative profile after mitochondrial stress assay showing the OCR of parental or sorafenib resistant SNU449 cells in response to sorafenib and/or SBI-993 treatment (n = 9 independent experiments). (Right panel) Graph showing basal OCR, proton leakage, maximal respiration, spare capacity, and ATP production (n = 9 independent experiments). **(b)** (left panel) Representative profile after mitochondrial stress assay showing the OCR of parental or sorafenib resistant SNU475 cells in response to sorafenib and/or SBI-993 treatment (n = 9 independent experiments). (Right panel) Graph showing basal OCR, proton leakage, maximal respiration, spare capacity, and ATP production (n = 9 independent experiments). **(c)** (left panel) Representative profile after glycolysis stress test showing the ECAR of parental or sorafenib resistant SNU449 cells in response to sorafenib and/or SBI-993 treatment (n = 9 independent experiments). (Right panel) Graph showing basal glycolysis, glycolytic capacity, and glycolytic reserve (n = 9 independent experiments). **(d)** (left panel) Representative profile after glycolysis stress test showing the ECAR of parental or sorafenib resistant SNU475 cells in response to sorafenib and/or SBI-993 treatment (n = 9 independent experiments). (Right panel) Graph showing basal glycolysis, glycolytic capacity, and glycolytic reserve (n = 9 independent experiments). **(e)** ATP production rate from glycolysis or oxidative phosphorylation in parental or sorafenib resistant SNU475 cells (n = 9 independent experiments). **(f)** In resistant HCC models, sorafenib works noncanonically to inhibit OXPHOS, leading to a shift to glycolysis and survival. However, pharmacological inhibition of ChREBP quenches glycolytic flux and sensitizes HCC cells to sorafenib action. All error bars represent mean  $\pm$  SEM. (a, b, c, d, e) Statistical analyses were made using two-way ANOVA and Tukey's multiple-comparisons test. \*\* P < 0.01. \*\*\* P < 0.001.

**a**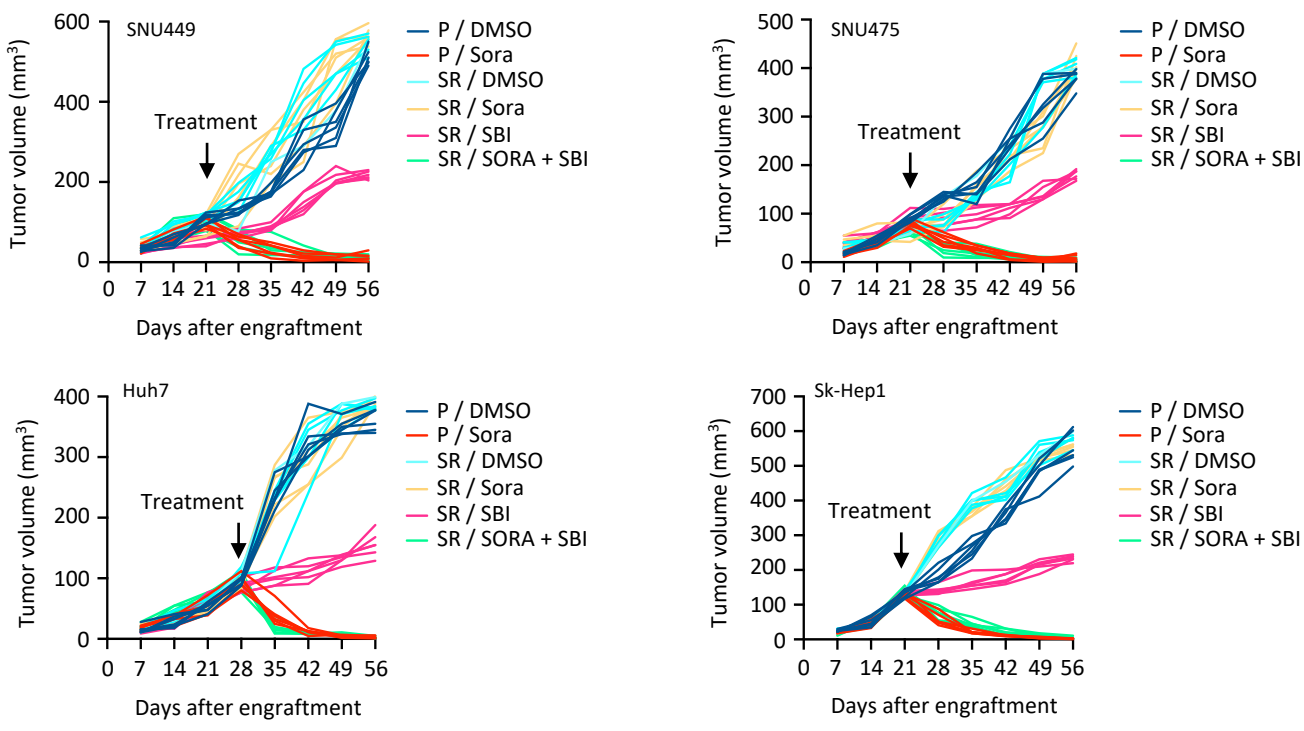**b**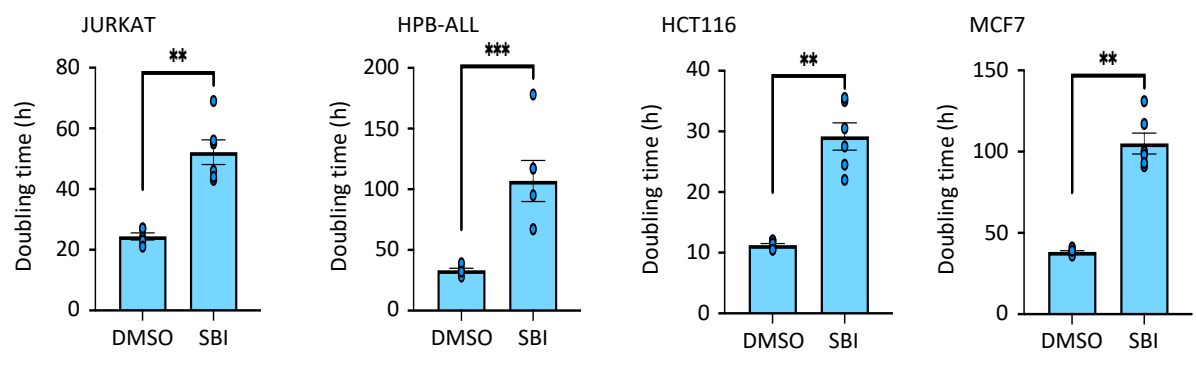**c**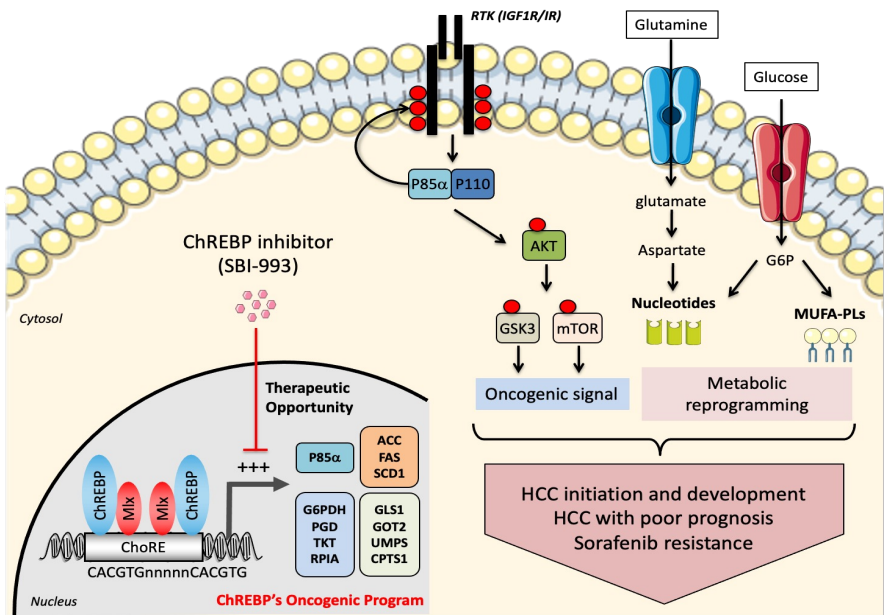**Figure. S17**

**Supplementary Figure 17.** SBI-993 improves sorafenib efficacy during HCC treatment *in vivo*. **(a)** The xenograft mouse model was established by subcutaneous injection of  $1 \times 10^7$  parental or sorafenib resistant SNU449, SNU475, Huh7 or SK-Hep1 cells into male Nude *mice*. *Mice* were then daily treated with sorafenib alone (40 mg/kg) or in combination with SBI-993 (50 mg/kg) when tumor size reached at least 100 mm<sup>3</sup>. The individual tumor growth kinetics of every mouse after different treatments are shown (n = 6 biologically independent *mice* per group). **(b)** Effect of SBI-993 treatment (40  $\mu$ M) on JURKAT, HPB-ALL, HCT116 and MCF7 proliferation (n = 6 biologically independent *mice* per group). **(c)** Role of ChREBP during HCC initiation and development. ChREBP serves as a molecular link between growth signals (PI3K/AKT signaling) and acute control over determinant intertwined metabolic pathways that are determinant in neoplastic cell growth and proliferation. All error bars represent mean  $\pm$  SEM. (b) Statistical analyses were made using unpaired two-sided Student's t-test. \*\* P < 0.01

**Supplementary Table 1. Publicly available microarray Datasets analyzed for ChREBP expression and altered target genes in HCC patients**

| Number              | Accession Number | Data compared *     | Numbers of samples |             | Main etiology reported               | reference               |
|---------------------|------------------|---------------------|--------------------|-------------|--------------------------------------|-------------------------|
|                     |                  |                     | Control            | HCC         |                                      |                         |
| 1                   | GSE14520         | Paired NT vs HCC    | 220                | 225         | NAFLD/NASH, HBV                      | (Roessler et al., 2010) |
| 2                   | GSE39791         | Matched NT vs HCC   | 72                 | 72          | NAFLD/NASH, HBV                      | (Kim et al., 2014)      |
| 3                   | GSE57957         | Adjacent NT vs HCC  | 39                 | 39          | NAFLD/NASH, HBV                      | (Mah et al., 2014)      |
| 4                   | GSE36376         | Adjacent NT vs HCC  | 193                | 240         | NAFLD/NASH, HBV                      | (Lim et al., 2013)      |
| 5                   | GSE60502         | Adjacent NT vs HCC  | 18                 | 18          | NA                                   | (Mas et al., 2009)      |
| 6                   | GSE14323         | Normal liver vs HCC | 19                 | 38          | HCV                                  | (Wang et al., 2014)     |
| 7                   | GSE25097         | Adjacent NT vs HCC  | 243                | 268         | NAFLD/NASH, HCV, HBV                 | (Lamb et al., 2011)     |
| 8                   | GSE62232         | Normal liver vs HCC | 10                 | 81          | Mixed: Alcohol, NAFLD/NASH, HCV      | (Schulze et al., 2015)  |
|                     | LHC dataset      | Normal liver vs HCC | 50                 | 334         | Mixed: Alcohol, NAFLD/NASH, HCV      |                         |
|                     | LICA-FR dataset  | Adjacent NT vs HCC  | 160                | 160         | Mixed: Alcohol, NAFLD/NASH, HCV, HBV |                         |
| <b>Total arrays</b> |                  |                     | <b>1024</b>        | <b>1475</b> |                                      |                         |

HBV/HCV, hepatitis B/C virus; NAFLD, Non Alcoholic Fatty Liver Disease; NASH, Non Alcoholic Steatohepatitis; HCC, hepatocellular carcinoma.

NA, detail could not be accessed.

NT, non tumoral tissue.

\* Description of the data compared as documented in the National Center for Biotechnology Information Gene Expression omnibus.

Differential expression was analyzed with GEO2R tool. The overall design for each data set can be found at <https://www.ncbi.nlm.nih.gov/geo/>.

## Supplementary Table 2: Main clinical characteristics of the LIHC and LICA-FR datasets

For each clinical characteristic, % are given as proportion of samples with available data.

### LICA-FR COHORT (n=160)

|                                     |                   |                         |
|-------------------------------------|-------------------|-------------------------|
| <b>Age</b>                          | Median 66         | From 21 to 94 years old |
| <b>Gender</b>                       | M                 | 126 (79%)               |
|                                     | F                 | 34 (21%)                |
| <b>Etiology</b>                     | Alcohol           | 63 (39%)                |
|                                     | Metabolic disease | 37 (23%)                |
|                                     | HCV               | 30 (19%)                |
|                                     | HBV               | 30 (19%)                |
| <b>Largest nodule diameter (mm)</b> | Median range      | 67 [12-210]             |
| <b>Fibrosis (METAVIR score)</b>     | F0-F1             | 75 (47%)                |
|                                     | F2-F3             | 32 (20%)                |
|                                     | F4                | 53 (33%)                |
| <b>Edmonson grade</b>               | I-II              | 48 (30%)                |
|                                     | III-IV            | 110 (70%)               |
|                                     | Not determined    | 2                       |
| <b>Vascular invasion</b>            | yes               | 93 (58%)                |
|                                     | no                | 67 (42%)                |

### LIHC COHORT (n=334)

|                               |                           |                         |
|-------------------------------|---------------------------|-------------------------|
| <b>Age</b>                    | Median 61                 | From 16 to 90 years old |
| <b>Gender</b>                 | M                         | 224 (67%)               |
|                               | F                         | 110 (33%)               |
| <b>Etiology</b>               | Alcohol                   | 106 (32%)               |
|                               | NAFLD                     | 19 (6%)                 |
|                               | HCV                       | 52 (16%)                |
|                               | HBV                       | 86 (26%)                |
| <b>Fibrosis (Ishak score)</b> | 0 - No Fibrosis           | 85 (36%)                |
|                               | 1,2 - Portal Fibrosis     | 35 (15%)                |
|                               | 3,4 - Fibrous Speta       | 28 (12%)                |
|                               | 5 - Nodular Formation and | 9 (4%)                  |
|                               | 6 - Established Cirrhosis | 78 (33%)                |
|                               | Not determined            | 99                      |
| <b>Histological grade</b>     | G1                        | 50 (15%)                |
|                               | G2                        | 160 (48%)               |
|                               | G3                        | 113 (34%)               |
|                               | G4                        | 7 (2%)                  |
|                               | Not determined            | 4                       |
| <b>Vascular invasion</b>      | Macro                     | 14 (5%)                 |
|                               | Micro                     | 80 (29%)                |
|                               | None                      | 186 (66%)               |
|                               | Not determined            | 54                      |

**Supplementary Table 3: Clinical characteristics of 12 HCC samples used for Western blots analysis**

| NUMBER | SEXE | AGE | BMI  | NASH | STEATOSIS | Fibrosis stage | Metabolic syndrome | Hepatitis B | Hepatitis C | Alcohol intake | Edmonson Grade |
|--------|------|-----|------|------|-----------|----------------|--------------------|-------------|-------------|----------------|----------------|
| 1      | M    | 68  | 24,9 | 0    | 0         | 0              | no                 | yes         | no          | no             | III-IV         |
| 2      | F    | 83  | 22,7 | 1    | 1 < 5%    | F4             | no                 | no          | yes         | no             | III-IV         |
| 3      | M    | 83  | 26,3 | 1    | 1 < 10%   | F3             | yes                | no          | no          | no             | I-II           |
| 4      | M    | 55  | 22,1 | 0    | 0         | F4             | no                 | yes         | no          | no             | III-IV         |
| 5      | M    | 62  | 22,1 | 1    | 0         | F4             | no                 | no          | yes         | no             | III-IV         |
| 6      | M    | 63  | 23,9 | 0    | 1 < 5%    | F2             | no                 | yes         | no          | no             | I-II           |
| 7      | M    | 70  | 28,3 | 0    | 1 > 40%   | 0              | yes                | no          | yes         | no             | I-II           |
| 8      | M    | 64  | 19,7 | 0    | 0         | F3             | no                 | no          | yes         | no             | I-II           |
| 9      | M    | 66  | 25,9 | 1    | 1 > 60%   | F4             | yes                | no          | no          | no             | III-IV         |
| 10     | M    | 83  | 25,6 | 1    | 1 > 60%   | F3             | yes                | no          | yes         | no             | III-IV         |
| 11     | M    | 76  | 24,3 | 0    | 1 > 40%   | F4             | yes                | no          | no          | no             | III-IV         |
| 12     | M    | 55  | 18,3 | 0    | 1 < 5%    | F1             | no                 | no          | no          | yes            | I-II           |
